# Supplementary material for: Defining Individual-Level Genetic Diversity and Similarity Profiles
Source: PubMed Central journal article supplement (PMC7118122; doi:10.1038/s41598-020-62362-8), 2020-04-02
Supplement: 41598_2020_62362_MOESM1_ESM.pdf [file 41598_2020_62362_MOESM1_ESM.pdf]

**Online Supplementary Information (OSI) for: Ma ZS, Li LW and Zhang YP (2019) Defining Individual-Level Genetic Diversity and Similarity Profiles. *Scientific Reports***

**List of Supplements**

Tables S2, S3, S5, & S6. Tables S1 & S4 are included in Excel files

Supplementary Figures S1, S2, S3, S4

R-Codes for Computing Alpha-Diversity, Beta-Diversity and Similarity Metrics

**Table S1.** The SNP-alpha diversity on each chromosome of each individual in the 1000-Genomes Project (Excel file)

**Table S2.** The mean (*per individual* within a population) SNP alpha-diversity on each chromosome (at the chromosome level) averaged across all individuals in same population: summarized from Table S1 for the SNP alpha-diversity on each chromosome of each individual in the 1000-Genomes Project with five ethnic groups including African (AFR), American (AMR), European (EUR), East Asian (EAS) and South Asian (SAS)

| Chromosomes | Populations | $q=0$  | $q=1$    | $q=2$   | $q=3$   | $q=4$   |
|-------------|-------------|--------|----------|---------|---------|---------|
| Chr1        | AFR         | 5296.0 | 1594.630 | 727.223 | 441.365 | 322.514 |
|             | AMR         | 5080.6 | 1513.867 | 694.462 | 424.723 | 311.736 |
|             | EUR         | 5035.5 | 1505.179 | 693.988 | 427.136 | 315.301 |
|             | EAS         | 5064.8 | 1520.801 | 696.132 | 421.306 | 306.225 |
|             | SAS         | 5057.3 | 1504.909 | 684.730 | 415.486 | 304.005 |
| Chr2        | AFR         | 4272.4 | 1177.721 | 533.779 | 327.393 | 241.935 |
|             | AMR         | 4061.3 | 1128.269 | 512.100 | 312.304 | 228.557 |
|             | EUR         | 4032.0 | 1122.050 | 509.032 | 306.302 | 220.254 |
|             | EAS         | 4020.9 | 1115.048 | 506.461 | 309.977 | 227.980 |
|             | SAS         | 4051.5 | 1125.352 | 510.612 | 310.431 | 226.277 |
| Chr3        | AFR         | 3226.4 | 853.189  | 392.716 | 251.388 | 190.692 |
|             | AMR         | 3082.4 | 823.893  | 378.615 | 240.065 | 180.767 |
|             | EUR         | 3062.2 | 817.491  | 375.955 | 238.730 | 179.953 |
|             | EAS         | 3062.9 | 823.747  | 383.862 | 246.727 | 187.514 |
|             | SAS         | 3070.1 | 824.662  | 380.009 | 240.928 | 181.075 |
| Chr4        | AFR         | 2771.7 | 799.163  | 383.177 | 245.351 | 186.577 |
|             | AMR         | 2670.2 | 784.563  | 380.555 | 243.096 | 182.390 |
|             | EUR         | 2658.9 | 782.129  | 377.793 | 239.757 | 178.714 |
|             | EAS         | 2653.9 | 782.664  | 378.795 | 242.183 | 182.706 |
|             | SAS         | 2672.1 | 782.376  | 377.140 | 240.041 | 180.029 |
| Chr5        | AFR         | 2800.7 | 850.552  | 446.119 | 303.384 | 238.204 |
|             | AMR         | 2651.8 | 808.863  | 425.955 | 291.025 | 228.849 |
|             | EUR         | 2642.8 | 805.494  | 426.092 | 293.527 | 232.247 |
|             | EAS         | 2607.8 | 791.762  | 415.878 | 283.279 | 222.314 |
|             | SAS         | 2653.5 | 811.364  | 428.554 | 293.167 | 230.476 |
| Chr6        | AFR         | 3182.1 | 918.023  | 448.378 | 270.401 | 188.881 |
|             | AMR         | 3041.0 | 880.579  | 437.194 | 270.204 | 191.323 |
|             | EUR         | 2992.0 | 865.928  | 432.077 | 267.974 | 190.347 |
|             | EAS         | 3033.2 | 875.631  | 429.599 | 261.371 | 182.923 |
|             | SAS         | 3030.2 | 882.757  | 438.785 | 270.264 | 190.932 |
| Chr7        | AFR         | 3250.8 | 754.542  | 294.365 | 164.909 | 115.291 |
|             | AMR         | 3080.7 | 724.446  | 288.168 | 162.803 | 114.399 |
|             | EUR         | 3057.5 | 724.419  | 291.739 | 165.536 | 116.281 |
|             | EAS         | 3061.1 | 725.540  | 291.404 | 166.521 | 118.123 |
|             | SAS         | 3072.1 | 726.102  | 290.393 | 164.919 | 116.202 |
| Chr8        | AFR         | 2380.0 | 549.574  | 180.124 | 83.937  | 55.411  |
|             | AMR         | 2264.6 | 512.036  | 158.917 | 73.054  | 48.443  |
|             | EUR         | 2244.2 | 507.978  | 157.173 | 72.031  | 47.730  |

|       |     |        |         |         |         |         |
|-------|-----|--------|---------|---------|---------|---------|
|       | EAS | 2246.3 | 510.106 | 157.890 | 71.663  | 47.337  |
|       | SAS | 2258.3 | 511.949 | 159.798 | 73.326  | 48.545  |
| Chr9  | AFR | 2353.8 | 619.606 | 225.550 | 106.915 | 70.033  |
|       | AMR | 2255.4 | 592.654 | 213.993 | 103.335 | 68.755  |
|       | EUR | 2239.9 | 593.456 | 216.971 | 105.455 | 70.224  |
|       | EAS | 2244.8 | 595.476 | 216.072 | 105.287 | 70.469  |
|       | SAS | 2253.7 | 594.678 | 215.811 | 104.630 | 69.653  |
| Chr10 | AFR | 2561.4 | 662.738 | 274.963 | 156.902 | 110.931 |
|       | AMR | 2463.0 | 646.309 | 273.928 | 158.076 | 111.906 |
|       | EUR | 2443.0 | 646.179 | 279.103 | 163.273 | 116.363 |
|       | EAS | 2453.3 | 647.375 | 267.664 | 149.519 | 103.866 |
|       | SAS | 2449.6 | 646.948 | 276.644 | 159.778 | 112.851 |
| Chr11 | AFR | 3082.0 | 734.311 | 291.120 | 178.190 | 135.772 |
|       | AMR | 2976.3 | 719.524 | 293.355 | 181.869 | 138.637 |
|       | EUR | 2972.7 | 721.191 | 294.932 | 182.870 | 139.347 |
|       | EAS | 2948.3 | 711.433 | 289.021 | 178.821 | 136.092 |
|       | SAS | 2972.1 | 715.971 | 289.908 | 178.846 | 135.951 |
| Chr12 | AFR | 2781.1 | 887.489 | 446.156 | 292.722 | 223.695 |
|       | AMR | 2685.6 | 842.080 | 421.309 | 276.896 | 211.540 |
|       | EUR | 2670.1 | 836.614 | 418.390 | 274.784 | 210.170 |
|       | EAS | 2684.5 | 852.528 | 431.018 | 284.692 | 217.993 |
|       | SAS | 2693.9 | 847.571 | 426.478 | 281.462 | 215.417 |
| Chr13 | AFR | 1471.0 | 409.478 | 201.936 | 133.488 | 102.852 |
|       | AMR | 1431.7 | 404.771 | 201.675 | 134.679 | 104.751 |
|       | EUR | 1429.6 | 405.339 | 203.286 | 136.929 | 107.234 |
|       | EAS | 1420.6 | 398.279 | 195.804 | 129.320 | 99.964  |
|       | SAS | 1430.7 | 399.487 | 197.351 | 131.029 | 101.481 |
| Chr14 | AFR | 1948.8 | 486.623 | 194.800 | 111.378 | 81.093  |
|       | AMR | 1855.5 | 465.893 | 186.858 | 107.393 | 78.671  |
|       | EUR | 1844.7 | 468.110 | 189.621 | 107.947 | 78.310  |
|       | EAS | 1843.2 | 463.040 | 185.001 | 105.529 | 76.802  |
|       | SAS | 1857.0 | 466.146 | 187.067 | 106.607 | 77.470  |
| Chr15 | AFR | 1961.2 | 554.270 | 276.276 | 184.260 | 142.292 |
|       | AMR | 1871.0 | 529.416 | 262.536 | 174.622 | 134.868 |
|       | EUR | 1861.8 | 527.346 | 261.121 | 173.301 | 133.771 |
|       | EAS | 1872.7 | 530.645 | 263.914 | 176.312 | 136.492 |
|       | SAS | 1870.2 | 529.622 | 260.876 | 172.202 | 132.262 |
| Chr16 | AFR | 2159.9 | 442.518 | 99.847  | 45.382  | 31.432  |
|       | AMR | 2025.5 | 401.427 | 91.010  | 41.855  | 29.164  |
|       | EUR | 2015.8 | 396.872 | 90.834  | 42.060  | 29.349  |
|       | EAS | 2009.7 | 395.067 | 88.274  | 40.283  | 28.038  |
|       | SAS | 2034.9 | 403.787 | 90.566  | 41.583  | 28.989  |
| Chr17 | AFR | 2555.1 | 808.022 | 381.283 | 245.468 | 187.547 |
|       | AMR | 2428.2 | 770.298 | 364.717 | 235.471 | 180.388 |
|       | EUR | 2412.1 | 764.247 | 362.937 | 235.282 | 180.663 |
|       | EAS | 2396.3 | 749.111 | 350.419 | 224.704 | 171.025 |
|       | SAS | 2427.4 | 766.874 | 361.629 | 233.128 | 178.179 |

|       |     |        |          |         |         |         |
|-------|-----|--------|----------|---------|---------|---------|
| Chr18 | AFR | 1098.1 | 334.052  | 177.111 | 122.991 | 96.987  |
|       | AMR | 1059.8 | 326.886  | 177.050 | 125.391 | 100.555 |
|       | EUR | 1057.0 | 325.277  | 177.354 | 126.243 | 101.459 |
|       | EAS | 1051.3 | 328.023  | 179.060 | 127.286 | 102.165 |
|       | SAS | 1056.5 | 326.583  | 178.301 | 127.023 | 102.162 |
| Chr19 | AFR | 2687.1 | 1178.514 | 623.956 | 376.814 | 268.821 |
|       | AMR | 2539.3 | 1068.645 | 555.975 | 338.345 | 243.697 |
|       | EUR | 2518.1 | 1057.339 | 555.796 | 342.731 | 248.333 |
|       | EAS | 2507.4 | 1048.921 | 545.547 | 333.945 | 241.746 |
|       | SAS | 2542.3 | 1069.018 | 557.660 | 341.967 | 248.131 |
| Chr20 | AFR | 1357.0 | 404.565  | 138.961 | 71.444  | 50.224  |
|       | AMR | 1278.9 | 367.845  | 121.779 | 61.773  | 43.381  |
|       | EUR | 1268.7 | 366.318  | 122.479 | 62.247  | 43.645  |
|       | EAS | 1267.0 | 369.451  | 124.502 | 63.873  | 45.005  |
|       | SAS | 1277.7 | 375.237  | 126.854 | 64.572  | 45.312  |
| Chr21 | AFR | 708.9  | 216.306  | 110.600 | 74.085  | 57.505  |
|       | AMR | 675.7  | 206.166  | 105.628 | 70.929  | 55.385  |
|       | EUR | 672.0  | 205.903  | 104.521 | 69.394  | 53.714  |
|       | EAS | 666.6  | 206.166  | 106.351 | 71.887  | 56.482  |
|       | SAS | 673.2  | 207.353  | 106.176 | 71.221  | 55.669  |
| Chr22 | AFR | 1266.4 | 350.378  | 139.021 | 81.734  | 60.498  |
|       | AMR | 1199.8 | 338.002  | 137.539 | 81.341  | 60.078  |
|       | EUR | 1189.0 | 340.085  | 141.272 | 84.836  | 63.239  |
|       | EAS | 1187.9 | 338.123  | 141.761 | 84.951  | 62.631  |
|       | SAS | 1202.2 | 340.819  | 139.125 | 81.958  | 60.237  |
| ChrX  | AFR | 1085.4 | 245.275  | 93.847  | 52.847  | 38.011  |
|       | AMR | 972.0  | 225.447  | 87.714  | 51.077  | 37.608  |
|       | EUR | 968.7  | 232.590  | 93.603  | 55.128  | 40.696  |
|       | EAS | 971.2  | 226.025  | 88.251  | 51.498  | 37.990  |
|       | SAS | 894.8  | 213.367  | 84.890  | 49.923  | 37.017  |
| ChrY  | AFR | 266.5  | 136.715  | 63.669  | 38.270  | 28.807  |
|       | AMR | 157.3  | 87.454   | 44.957  | 28.818  | 22.379  |
|       | EUR | 137.2  | 77.786   | 40.685  | 26.077  | 20.218  |
|       | EAS | 238.7  | 136.654  | 71.336  | 44.499  | 33.626  |
|       | SAS | 215.3  | 125.332  | 67.853  | 44.271  | 34.494  |
| Means | AFR | 2355.1 | 665.344  | 297.707 | 181.709 | 134.417 |
|       | AMR | 2242.0 | 632.056  | 283.999 | 174.548 | 129.510 |
|       | EUR | 2226.1 | 628.972  | 284.031 | 174.981 | 129.898 |
|       | EAS | 2229.8 | 630.901  | 283.501 | 173.976 | 128.980 |
|       | SAS | 2238.2 | 633.261  | 284.884 | 174.948 | 129.701 |

**Table S3.** The  $p$ -value from Wilcoxon tests for the SNP alpha-diversity between different populations (The bottom section listed the “Percentages (%) of Pairs with Significant Differences”, *e.g.*, pair=AFR vs. AMR)

| Chromosome | Treatments  | $q=0$ | $q=1$ | $q=2$ | $q=3$ | $q=4$ |
|------------|-------------|-------|-------|-------|-------|-------|
| Chr1       | AFR vs. AMR | 0.000 | 0.000 | 0.000 | 0.000 | 0.000 |
|            | AFR vs. EUR | 0.000 | 0.000 | 0.000 | 0.000 | 0.000 |
|            | AFR vs. EAS | 0.000 | 0.000 | 0.000 | 0.000 | 0.000 |
|            | AFR vs. SAS | 0.000 | 0.000 | 0.000 | 0.000 | 0.000 |
|            | AMR vs. EUR | 0.000 | 0.000 | 0.943 | 0.021 | 0.000 |
|            | AMR vs. EAS | 0.000 | 0.000 | 0.126 | 0.005 | 0.000 |
|            | AMR vs. SAS | 0.000 | 0.000 | 0.000 | 0.000 | 0.000 |
|            | EUR vs. EAS | 0.000 | 0.000 | 0.066 | 0.000 | 0.000 |
|            | EUR vs. SAS | 0.000 | 0.626 | 0.000 | 0.000 | 0.000 |
|            | EAS vs. SAS | 0.000 | 0.000 | 0.000 | 0.000 | 0.009 |
| Chr2       | AFR vs. AMR | 0.000 | 0.000 | 0.000 | 0.000 | 0.000 |
|            | AFR vs. EUR | 0.000 | 0.000 | 0.000 | 0.000 | 0.000 |
|            | AFR vs. EAS | 0.000 | 0.000 | 0.000 | 0.000 | 0.000 |
|            | AFR vs. SAS | 0.000 | 0.000 | 0.000 | 0.000 | 0.000 |
|            | AMR vs. EUR | 0.000 | 0.000 | 0.005 | 0.000 | 0.000 |
|            | AMR vs. EAS | 0.000 | 0.000 | 0.000 | 0.010 | 0.712 |
|            | AMR vs. SAS | 0.016 | 0.013 | 0.089 | 0.023 | 0.009 |
|            | EUR vs. EAS | 0.000 | 0.000 | 0.001 | 0.000 | 0.000 |
|            | EUR vs. SAS | 0.000 | 0.001 | 0.214 | 0.000 | 0.000 |
|            | EAS vs. SAS | 0.000 | 0.000 | 0.000 | 0.953 | 0.005 |
| Chr3       | AFR vs. AMR | 0.000 | 0.000 | 0.000 | 0.000 | 0.000 |
|            | AFR vs. EUR | 0.000 | 0.000 | 0.000 | 0.000 | 0.000 |
|            | AFR vs. EAS | 0.000 | 0.000 | 0.000 | 0.000 | 0.000 |
|            | AFR vs. SAS | 0.000 | 0.000 | 0.000 | 0.000 | 0.000 |
|            | AMR vs. EUR | 0.000 | 0.000 | 0.000 | 0.027 | 0.109 |
|            | AMR vs. EAS | 0.000 | 0.930 | 0.000 | 0.000 | 0.000 |
|            | AMR vs. SAS | 0.000 | 0.224 | 0.043 | 0.219 | 0.855 |
|            | EUR vs. EAS | 0.710 | 0.000 | 0.000 | 0.000 | 0.000 |
|            | EUR vs. SAS | 0.000 | 0.000 | 0.000 | 0.000 | 0.036 |
|            | EAS vs. SAS | 0.000 | 0.105 | 0.000 | 0.000 | 0.000 |
| Chr4       | AFR vs. AMR | 0.000 | 0.000 | 0.000 | 0.000 | 0.000 |
|            | AFR vs. EUR | 0.000 | 0.000 | 0.000 | 0.000 | 0.000 |
|            | AFR vs. EAS | 0.000 | 0.000 | 0.000 | 0.000 | 0.000 |
|            | AFR vs. SAS | 0.000 | 0.000 | 0.000 | 0.000 | 0.000 |
|            | AMR vs. EUR | 0.000 | 0.004 | 0.000 | 0.000 | 0.000 |
|            | AMR vs. EAS | 0.000 | 0.037 | 0.010 | 0.092 | 0.483 |
|            | AMR vs. SAS | 0.009 | 0.015 | 0.000 | 0.000 | 0.000 |
|            | EUR vs. EAS | 0.000 | 0.277 | 0.129 | 0.000 | 0.000 |
|            | EUR vs. SAS | 0.000 | 0.676 | 0.339 | 0.573 | 0.005 |
|            | EAS vs. SAS | 0.000 | 0.631 | 0.018 | 0.001 | 0.000 |
| Chr5       | AFR vs. AMR | 0.000 | 0.000 | 0.000 | 0.000 | 0.000 |
|            | AFR vs. EUR | 0.000 | 0.000 | 0.000 | 0.000 | 0.000 |
|            | AFR vs. EAS | 0.000 | 0.000 | 0.000 | 0.000 | 0.000 |

|      |             |       |       |       |       |       |
|------|-------------|-------|-------|-------|-------|-------|
|      | AFR vs. SAS | 0.000 | 0.000 | 0.000 | 0.000 | 0.000 |
|      | AMR vs. EUR | 0.000 | 0.001 | 0.961 | 0.002 | 0.000 |
|      | AMR vs. EAS | 0.000 | 0.000 | 0.000 | 0.000 | 0.000 |
|      | AMR vs. SAS | 0.270 | 0.005 | 0.002 | 0.005 | 0.024 |
|      | EUR vs. EAS | 0.000 | 0.000 | 0.000 | 0.000 | 0.000 |
|      | EUR vs. SAS | 0.000 | 0.000 | 0.001 | 0.714 | 0.007 |
|      | EAS vs. SAS | 0.000 | 0.000 | 0.000 | 0.000 | 0.000 |
| Chr6 | AFR vs. AMR | 0.000 | 0.000 | 0.000 | 0.757 | 0.100 |
|      | AFR vs. EUR | 0.000 | 0.000 | 0.000 | 0.040 | 0.181 |
|      | AFR vs. EAS | 0.000 | 0.000 | 0.000 | 0.000 | 0.000 |
|      | AFR vs. SAS | 0.000 | 0.000 | 0.000 | 0.797 | 0.174 |
|      | AMR vs. EUR | 0.000 | 0.000 | 0.000 | 0.164 | 0.617 |
|      | AMR vs. EAS | 0.002 | 0.000 | 0.000 | 0.000 | 0.000 |
|      | AMR vs. SAS | 0.000 | 0.067 | 0.118 | 0.959 | 0.778 |
|      | EUR vs. EAS | 0.000 | 0.000 | 0.025 | 0.000 | 0.000 |
|      | EUR vs. SAS | 0.000 | 0.000 | 0.000 | 0.122 | 0.840 |
|      | EAS vs. SAS | 0.430 | 0.000 | 0.000 | 0.000 | 0.000 |
| Chr7 | AFR vs. AMR | 0.000 | 0.000 | 0.000 | 0.002 | 0.068 |
|      | AFR vs. EUR | 0.000 | 0.000 | 0.000 | 0.324 | 0.080 |
|      | AFR vs. EAS | 0.000 | 0.000 | 0.000 | 0.000 | 0.000 |
|      | AFR vs. SAS | 0.000 | 0.000 | 0.000 | 0.713 | 0.139 |
|      | AMR vs. EUR | 0.000 | 0.871 | 0.000 | 0.001 | 0.006 |
|      | AMR vs. EAS | 0.000 | 0.233 | 0.000 | 0.000 | 0.000 |
|      | AMR vs. SAS | 0.011 | 0.064 | 0.009 | 0.008 | 0.009 |
|      | EUR vs. EAS | 0.044 | 0.113 | 0.757 | 0.038 | 0.000 |
|      | EUR vs. SAS | 0.000 | 0.018 | 0.060 | 0.246 | 0.755 |
|      | EAS vs. SAS | 0.000 | 0.380 | 0.090 | 0.000 | 0.000 |
| Chr8 | AFR vs. AMR | 0.000 | 0.000 | 0.000 | 0.000 | 0.000 |
|      | AFR vs. EUR | 0.000 | 0.000 | 0.000 | 0.000 | 0.000 |
|      | AFR vs. EAS | 0.000 | 0.000 | 0.000 | 0.000 | 0.000 |
|      | AFR vs. SAS | 0.000 | 0.000 | 0.000 | 0.000 | 0.000 |
|      | AMR vs. EUR | 0.000 | 0.000 | 0.016 | 0.038 | 0.033 |
|      | AMR vs. EAS | 0.000 | 0.036 | 0.259 | 0.002 | 0.000 |
|      | AMR vs. SAS | 0.007 | 0.734 | 0.035 | 0.117 | 0.211 |
|      | EUR vs. EAS | 0.047 | 0.000 | 0.092 | 0.154 | 0.024 |
|      | EUR vs. SAS | 0.000 | 0.000 | 0.000 | 0.000 | 0.000 |
|      | EAS vs. SAS | 0.000 | 0.001 | 0.000 | 0.000 | 0.000 |
| Chr9 | AFR vs. AMR | 0.000 | 0.000 | 0.000 | 0.000 | 0.000 |
|      | AFR vs. EUR | 0.000 | 0.000 | 0.000 | 0.000 | 0.825 |
|      | AFR vs. EAS | 0.000 | 0.000 | 0.000 | 0.000 | 0.443 |
|      | AFR vs. SAS | 0.000 | 0.000 | 0.000 | 0.000 | 0.047 |
|      | AMR vs. EUR | 0.000 | 0.413 | 0.001 | 0.000 | 0.000 |
|      | AMR vs. EAS | 0.000 | 0.001 | 0.014 | 0.001 | 0.000 |
|      | AMR vs. SAS | 0.711 | 0.018 | 0.055 | 0.054 | 0.061 |
|      | EUR vs. EAS | 0.000 | 0.002 | 0.217 | 0.640 | 0.645 |
|      | EUR vs. SAS | 0.000 | 0.061 | 0.071 | 0.045 | 0.038 |
|      | EAS vs. SAS | 0.000 | 0.255 | 0.549 | 0.119 | 0.012 |

|       |             |       |       |       |       |       |
|-------|-------------|-------|-------|-------|-------|-------|
| Chr10 | AFR vs. AMR | 0.000 | 0.000 | 0.170 | 0.095 | 0.169 |
|       | AFR vs. EUR | 0.000 | 0.000 | 0.000 | 0.000 | 0.000 |
|       | AFR vs. EAS | 0.000 | 0.000 | 0.000 | 0.000 | 0.000 |
|       | AFR vs. SAS | 0.000 | 0.000 | 0.007 | 0.000 | 0.001 |
|       | AMR vs. EUR | 0.000 | 0.698 | 0.000 | 0.000 | 0.000 |
|       | AMR vs. EAS | 0.000 | 0.208 | 0.000 | 0.000 | 0.000 |
|       | AMR vs. SAS | 0.000 | 0.432 | 0.001 | 0.034 | 0.164 |
|       | EUR vs. EAS | 0.000 | 0.361 | 0.000 | 0.000 | 0.000 |
|       | EUR vs. SAS | 0.000 | 0.633 | 0.001 | 0.000 | 0.000 |
|       | EAS vs. SAS | 0.013 | 0.648 | 0.000 | 0.000 | 0.000 |
| Chr11 | AFR vs. AMR | 0.000 | 0.000 | 0.000 | 0.000 | 0.000 |
|       | AFR vs. EUR | 0.000 | 0.000 | 0.000 | 0.000 | 0.000 |
|       | AFR vs. EAS | 0.000 | 0.000 | 0.000 | 0.106 | 0.494 |
|       | AFR vs. SAS | 0.000 | 0.000 | 0.014 | 0.111 | 0.633 |
|       | AMR vs. EUR | 0.133 | 0.074 | 0.055 | 0.244 | 0.448 |
|       | AMR vs. EAS | 0.000 | 0.000 | 0.000 | 0.000 | 0.000 |
|       | AMR vs. SAS | 0.239 | 0.000 | 0.000 | 0.000 | 0.000 |
|       | EUR vs. EAS | 0.000 | 0.000 | 0.000 | 0.000 | 0.000 |
|       | EUR vs. SAS | 0.426 | 0.000 | 0.000 | 0.000 | 0.000 |
|       | EAS vs. SAS | 0.000 | 0.000 | 0.144 | 0.923 | 0.867 |
| Chr12 | AFR vs. AMR | 0.000 | 0.000 | 0.000 | 0.000 | 0.000 |
|       | AFR vs. EUR | 0.000 | 0.000 | 0.000 | 0.000 | 0.000 |
|       | AFR vs. EAS | 0.000 | 0.000 | 0.000 | 0.000 | 0.000 |
|       | AFR vs. SAS | 0.000 | 0.000 | 0.000 | 0.000 | 0.000 |
|       | AMR vs. EUR | 0.000 | 0.000 | 0.001 | 0.008 | 0.087 |
|       | AMR vs. EAS | 0.950 | 0.000 | 0.000 | 0.000 | 0.000 |
|       | AMR vs. SAS | 0.000 | 0.000 | 0.000 | 0.000 | 0.000 |
|       | EUR vs. EAS | 0.000 | 0.000 | 0.000 | 0.000 | 0.000 |
|       | EUR vs. SAS | 0.000 | 0.000 | 0.000 | 0.000 | 0.000 |
|       | EAS vs. SAS | 0.000 | 0.000 | 0.000 | 0.000 | 0.000 |
| Chr13 | AFR vs. AMR | 0.000 | 0.000 | 0.476 | 0.005 | 0.000 |
|       | AFR vs. EUR | 0.000 | 0.000 | 0.000 | 0.000 | 0.000 |
|       | AFR vs. EAS | 0.000 | 0.000 | 0.000 | 0.000 | 0.000 |
|       | AFR vs. SAS | 0.000 | 0.000 | 0.000 | 0.000 | 0.000 |
|       | AMR vs. EUR | 0.012 | 0.169 | 0.000 | 0.000 | 0.000 |
|       | AMR vs. EAS | 0.000 | 0.000 | 0.000 | 0.000 | 0.000 |
|       | AMR vs. SAS | 0.180 | 0.000 | 0.000 | 0.000 | 0.000 |
|       | EUR vs. EAS | 0.000 | 0.000 | 0.000 | 0.000 | 0.000 |
|       | EUR vs. SAS | 0.109 | 0.000 | 0.000 | 0.000 | 0.000 |
|       | EAS vs. SAS | 0.000 | 0.001 | 0.000 | 0.000 | 0.000 |
| Chr14 | AFR vs. AMR | 0.000 | 0.000 | 0.000 | 0.000 | 0.000 |
|       | AFR vs. EUR | 0.000 | 0.000 | 0.000 | 0.000 | 0.000 |
|       | AFR vs. EAS | 0.000 | 0.000 | 0.000 | 0.000 | 0.000 |
|       | AFR vs. SAS | 0.000 | 0.000 | 0.000 | 0.000 | 0.000 |
|       | AMR vs. EUR | 0.000 | 0.001 | 0.000 | 0.363 | 0.279 |
|       | AMR vs. EAS | 0.000 | 0.000 | 0.007 | 0.000 | 0.000 |
|       | AMR vs. SAS | 0.315 | 0.497 | 0.507 | 0.181 | 0.009 |

|       |             |       |       |       |       |       |
|-------|-------------|-------|-------|-------|-------|-------|
|       | EUR vs. EAS | 0.186 | 0.000 | 0.000 | 0.000 | 0.000 |
|       | EUR vs. SAS | 0.000 | 0.001 | 0.000 | 0.014 | 0.089 |
|       | EAS vs. SAS | 0.000 | 0.000 | 0.000 | 0.008 | 0.034 |
| Chr15 | AFR vs. AMR | 0.000 | 0.000 | 0.000 | 0.000 | 0.000 |
|       | AFR vs. EUR | 0.000 | 0.000 | 0.000 | 0.000 | 0.000 |
|       | AFR vs. EAS | 0.000 | 0.000 | 0.000 | 0.000 | 0.000 |
|       | AFR vs. SAS | 0.000 | 0.000 | 0.000 | 0.000 | 0.000 |
|       | AMR vs. EUR | 0.000 | 0.012 | 0.033 | 0.027 | 0.052 |
|       | AMR vs. EAS | 0.157 | 0.054 | 0.036 | 0.013 | 0.018 |
|       | AMR vs. SAS | 0.713 | 0.590 | 0.015 | 0.000 | 0.000 |
|       | EUR vs. EAS | 0.000 | 0.000 | 0.000 | 0.000 | 0.000 |
|       | EUR vs. SAS | 0.000 | 0.001 | 0.732 | 0.050 | 0.003 |
|       | EAS vs. SAS | 0.011 | 0.134 | 0.000 | 0.000 | 0.000 |
| Chr16 | AFR vs. AMR | 0.000 | 0.000 | 0.000 | 0.000 | 0.000 |
|       | AFR vs. EUR | 0.000 | 0.000 | 0.000 | 0.000 | 0.000 |
|       | AFR vs. EAS | 0.000 | 0.000 | 0.000 | 0.000 | 0.000 |
|       | AFR vs. SAS | 0.000 | 0.000 | 0.000 | 0.000 | 0.000 |
|       | AMR vs. EUR | 0.000 | 0.000 | 0.615 | 0.263 | 0.146 |
|       | AMR vs. EAS | 0.000 | 0.000 | 0.000 | 0.000 | 0.000 |
|       | AMR vs. SAS | 0.000 | 0.003 | 0.085 | 0.036 | 0.036 |
|       | EUR vs. EAS | 0.000 | 0.021 | 0.000 | 0.000 | 0.000 |
|       | EUR vs. SAS | 0.000 | 0.000 | 0.145 | 0.000 | 0.000 |
|       | EAS vs. SAS | 0.000 | 0.000 | 0.000 | 0.000 | 0.000 |
| Chr17 | AFR vs. AMR | 0.000 | 0.000 | 0.000 | 0.000 | 0.000 |
|       | AFR vs. EUR | 0.000 | 0.000 | 0.000 | 0.000 | 0.000 |
|       | AFR vs. EAS | 0.000 | 0.000 | 0.000 | 0.000 | 0.000 |
|       | AFR vs. SAS | 0.000 | 0.000 | 0.000 | 0.000 | 0.000 |
|       | AMR vs. EUR | 0.000 | 0.000 | 0.208 | 0.857 | 0.439 |
|       | AMR vs. EAS | 0.000 | 0.000 | 0.000 | 0.000 | 0.000 |
|       | AMR vs. SAS | 0.527 | 0.033 | 0.008 | 0.012 | 0.006 |
|       | EUR vs. EAS | 0.000 | 0.000 | 0.000 | 0.000 | 0.000 |
|       | EUR vs. SAS | 0.000 | 0.015 | 0.104 | 0.001 | 0.000 |
|       | EAS vs. SAS | 0.000 | 0.000 | 0.000 | 0.000 | 0.000 |
| Chr18 | AFR vs. AMR | 0.000 | 0.000 | 0.857 | 0.000 | 0.000 |
|       | AFR vs. EUR | 0.000 | 0.000 | 0.374 | 0.000 | 0.000 |
|       | AFR vs. EAS | 0.000 | 0.000 | 0.000 | 0.000 | 0.000 |
|       | AFR vs. SAS | 0.000 | 0.000 | 0.000 | 0.000 | 0.000 |
|       | AMR vs. EUR | 0.007 | 0.000 | 0.381 | 0.033 | 0.028 |
|       | AMR vs. EAS | 0.000 | 0.001 | 0.000 | 0.000 | 0.000 |
|       | AMR vs. SAS | 0.002 | 0.650 | 0.001 | 0.000 | 0.000 |
|       | EUR vs. EAS | 0.000 | 0.000 | 0.000 | 0.000 | 0.011 |
|       | EUR vs. SAS | 0.570 | 0.000 | 0.003 | 0.019 | 0.049 |
|       | EAS vs. SAS | 0.000 | 0.000 | 0.009 | 0.247 | 0.635 |
| Chr19 | AFR vs. AMR | 0.000 | 0.000 | 0.000 | 0.000 | 0.000 |
|       | AFR vs. EUR | 0.000 | 0.000 | 0.000 | 0.000 | 0.000 |
|       | AFR vs. EAS | 0.000 | 0.000 | 0.000 | 0.000 | 0.000 |
|       | AFR vs. SAS | 0.000 | 0.000 | 0.000 | 0.000 | 0.000 |



|       |             |       |       |       |       |       |
|-------|-------------|-------|-------|-------|-------|-------|
|       | AMR vs. EUR | 0.000 | 0.000 | 0.688 | 0.014 | 0.009 |
|       | AMR vs. EAS | 0.000 | 0.000 | 0.000 | 0.028 | 0.264 |
|       | AMR vs. SAS | 0.002 | 0.150 | 0.088 | 0.012 | 0.002 |
|       | EUR vs. EAS | 0.000 | 0.000 | 0.000 | 0.000 | 0.000 |
|       | EUR vs. SAS | 0.000 | 0.000 | 0.154 | 0.921 | 0.677 |
|       | EAS vs. SAS | 0.000 | 0.000 | 0.000 | 0.000 | 0.000 |
| Chr20 | AFR vs. AMR | 0.000 | 0.000 | 0.000 | 0.000 | 0.000 |
|       | AFR vs. EUR | 0.000 | 0.000 | 0.000 | 0.000 | 0.000 |
|       | AFR vs. EAS | 0.000 | 0.000 | 0.000 | 0.000 | 0.000 |
|       | AFR vs. SAS | 0.000 | 0.000 | 0.000 | 0.000 | 0.000 |
|       | AMR vs. EUR | 0.000 | 0.409 | 0.095 | 0.112 | 0.225 |
|       | AMR vs. EAS | 0.000 | 0.008 | 0.000 | 0.000 | 0.000 |
|       | AMR vs. SAS | 0.688 | 0.000 | 0.000 | 0.000 | 0.000 |
|       | EUR vs. EAS | 0.026 | 0.000 | 0.000 | 0.000 | 0.000 |
|       | EUR vs. SAS | 0.000 | 0.000 | 0.000 | 0.000 | 0.000 |
|       | EAS vs. SAS | 0.000 | 0.000 | 0.000 | 0.007 | 0.106 |
| Chr21 | AFR vs. AMR | 0.000 | 0.000 | 0.000 | 0.000 | 0.000 |
|       | AFR vs. EUR | 0.000 | 0.000 | 0.000 | 0.000 | 0.000 |
|       | AFR vs. EAS | 0.000 | 0.000 | 0.000 | 0.000 | 0.000 |
|       | AFR vs. SAS | 0.000 | 0.000 | 0.000 | 0.000 | 0.000 |
|       | AMR vs. EUR | 0.000 | 0.627 | 0.001 | 0.000 | 0.000 |
|       | AMR vs. EAS | 0.000 | 0.837 | 0.042 | 0.013 | 0.004 |
|       | AMR vs. SAS | 0.004 | 0.003 | 0.086 | 0.383 | 0.436 |
|       | EUR vs. EAS | 0.000 | 0.330 | 0.000 | 0.000 | 0.000 |
|       | EUR vs. SAS | 0.016 | 0.000 | 0.000 | 0.000 | 0.000 |
|       | EAS vs. SAS | 0.000 | 0.000 | 0.912 | 0.089 | 0.025 |
| Chr22 | AFR vs. AMR | 0.000 | 0.000 | 0.007 | 0.629 | 0.410 |
|       | AFR vs. EUR | 0.000 | 0.000 | 0.000 | 0.000 | 0.000 |
|       | AFR vs. EAS | 0.000 | 0.000 | 0.000 | 0.000 | 0.000 |
|       | AFR vs. SAS | 0.000 | 0.000 | 0.781 | 0.688 | 0.249 |
|       | AMR vs. EUR | 0.000 | 0.005 | 0.000 | 0.000 | 0.000 |
|       | AMR vs. EAS | 0.000 | 0.981 | 0.000 | 0.000 | 0.000 |
|       | AMR vs. SAS | 0.004 | 0.000 | 0.013 | 0.372 | 0.990 |
|       | EUR vs. EAS | 0.111 | 0.001 | 0.364 | 0.761 | 0.176 |
|       | EUR vs. SAS | 0.000 | 0.238 | 0.000 | 0.000 | 0.000 |
|       | EAS vs. SAS | 0.000 | 0.000 | 0.000 | 0.000 | 0.000 |
| ChrX  | AFR vs. AMR | 0.000 | 0.000 | 0.019 | 0.698 | 0.087 |
|       | AFR vs. EUR | 0.000 | 0.000 | 0.513 | 0.003 | 0.000 |
|       | AFR vs. EAS | 0.000 | 0.013 | 0.394 | 0.206 | 0.005 |
|       | AFR vs. SAS | 0.000 | 0.000 | 0.532 | 0.013 | 0.000 |
|       | AMR vs. EUR | 0.000 | 0.941 | 0.059 | 0.039 | 0.040 |
|       | AMR vs. EAS | 0.163 | 0.050 | 0.043 | 0.079 | 0.090 |
|       | AMR vs. SAS | 0.952 | 0.139 | 0.183 | 0.289 | 0.279 |
|       | EUR vs. EAS | 0.000 | 0.268 | 0.582 | 0.386 | 0.371 |
|       | EUR vs. SAS | 0.000 | 0.029 | 0.606 | 0.302 | 0.336 |
|       | EAS vs. SAS | 0.051 | 0.347 | 0.197 | 0.204 | 0.239 |
| ChrY  | AFR vs. AMR | 0.000 | 0.000 | 0.000 | 0.002 | 0.008 |

|                                                               |             |       |       |       |       |       |
|---------------------------------------------------------------|-------------|-------|-------|-------|-------|-------|
|                                                               | AFR vs. EUR | 0.000 | 0.000 | 0.000 | 0.000 | 0.000 |
|                                                               | AFR vs. EAS | 0.000 | 0.000 | 0.000 | 0.000 | 0.000 |
|                                                               | AFR vs. SAS | 0.000 | 0.000 | 0.000 | 0.000 | 0.000 |
|                                                               | AMR vs. EUR | 0.010 | 0.012 | 0.163 | 0.094 | 0.045 |
|                                                               | AMR vs. EAS | 0.000 | 0.000 | 0.000 | 0.000 | 0.000 |
|                                                               | AMR vs. SAS | 0.000 | 0.000 | 0.000 | 0.000 | 0.000 |
|                                                               | EUR vs. EAS | 0.000 | 0.000 | 0.000 | 0.000 | 0.000 |
|                                                               | EUR vs. SAS | 0.000 | 0.000 | 0.000 | 0.000 | 0.000 |
|                                                               | EAS vs. SAS | 0.000 | 0.000 | 0.000 | 0.022 | 0.004 |
| Percentage (%)<br>of Pairs with<br>Significant<br>Differences | AFR vs. AMR | 100.0 | 100.0 | 87.5  | 83.3  | 79.2  |
|                                                               | AFR vs. EUR | 100.0 | 100.0 | 91.7  | 95.8  | 87.5  |
|                                                               | AFR vs. EAS | 100.0 | 100.0 | 95.8  | 91.7  | 91.7  |
|                                                               | AFR vs. SAS | 100.0 | 100.0 | 91.7  | 83.3  | 83.3  |
|                                                               | AMR vs. EUR | 95.8  | 66.7  | 58.3  | 70.8  | 62.5  |
|                                                               | AMR vs. EAS | 87.5  | 75.0  | 91.7  | 91.7  | 83.3  |
|                                                               | AMR vs. SAS | 62.5  | 58.3  | 66.7  | 66.7  | 66.7  |
|                                                               | EUR vs. EAS | 87.5  | 79.2  | 70.8  | 83.3  | 87.5  |
|                                                               | EUR vs. SAS | 87.5  | 79.2  | 62.5  | 75.0  | 79.2  |
|                                                               | EAS vs. SAS | 91.7  | 70.8  | 79.2  | 75.0  | 83.3  |

**Table S4.** SNP-alpha diversity of each individual in the 1000-Genomes Project (Excel file)

**Table S5.** The  $p$ -value of Wilcoxon tests for the SNP-alpha diversity of whole genome among different populations

| Treatments                                         | $q=0$     | $q=1$     | $q=2$     | $q=3$     | $q=4$     |
|----------------------------------------------------|-----------|-----------|-----------|-----------|-----------|
| AFR vs. AMR                                        | 0.000     | 0.000     | 0.000     | 0.000     | 0.000     |
| AFR vs. EUR                                        | 0.000     | 0.000     | 0.000     | 0.000     | 0.000     |
| AFR vs. EAS                                        | 0.000     | 0.000     | 0.000     | 0.000     | 0.000     |
| AFR vs. SAS                                        | 0.000     | 0.000     | 0.000     | 0.000     | 0.000     |
| AMR vs. EUR                                        | 0.000     | 0.000     | 0.155     | 0.161     | 0.911     |
| AMR vs. EAS                                        | 0.000     | 0.000     | 0.000     | 0.000     | 0.000     |
| AMR vs. SAS                                        | 0.026     | 0.883     | 0.512     | 0.820     | 0.871     |
| EUR vs. EAS                                        | 0.368     | 0.176     | 0.000     | 0.000     | 0.000     |
| EUR vs. SAS                                        | 0.000     | 0.000     | 0.529     | 0.123     | 0.895     |
| EAS vs. SAS                                        | 0.000     | 0.000     | 0.000     | 0.000     | 0.000     |
| <b>% of Pairs with<br/>Significant Differences</b> | <b>90</b> | <b>80</b> | <b>70</b> | <b>70</b> | <b>70</b> |

**Table S6.** The means of pair-wise, chromosome-level SNP beta-diversity and similarity measures between any two individuals belonging to two different populations [chromosome level=compared SNPs on the two corresponding (*i.e.*, the same numbered) chromosomes from two individuals belonging to different populations]

| Treats      | Chromosome | $q=0$ |                          |       |       |       | $q=1$ |                          |       |       |       | $q=2$ |                          |       |       |       |
|-------------|------------|-------|--------------------------|-------|-------|-------|-------|--------------------------|-------|-------|-------|-------|--------------------------|-------|-------|-------|
|             |            | Beta  | Four Similarity Measures |       |       |       | Beta  | Four Similarity Measures |       |       |       | Beta  | Four Similarity Measures |       |       |       |
|             |            |       | $C_q$                    | $U_q$ | $S_q$ | $V_q$ |       | $C_q$                    | $U_q$ | $S_q$ | $V_q$ |       | $C_q$                    | $U_q$ | $S_q$ | $V_q$ |
| AFR vs. AMR | Chr1       | 1.054 | 0.946                    | 0.897 | 0.897 | 0.946 | 1.036 | 0.948                    | 0.948 | 0.930 | 0.964 | 1.028 | 0.945                    | 0.972 | 0.945 | 0.972 |
|             | Chr2       | 1.055 | 0.945                    | 0.896 | 0.896 | 0.945 | 1.036 | 0.949                    | 0.949 | 0.930 | 0.964 | 1.030 | 0.942                    | 0.970 | 0.942 | 0.970 |
|             | Chr3       | 1.049 | 0.951                    | 0.907 | 0.907 | 0.951 | 1.034 | 0.951                    | 0.951 | 0.933 | 0.966 | 1.028 | 0.945                    | 0.972 | 0.945 | 0.972 |
|             | Chr4       | 1.043 | 0.957                    | 0.917 | 0.917 | 0.957 | 1.033 | 0.954                    | 0.954 | 0.937 | 0.967 | 1.029 | 0.943                    | 0.971 | 0.943 | 0.971 |
|             | Chr5       | 1.052 | 0.948                    | 0.901 | 0.901 | 0.948 | 1.036 | 0.949                    | 0.949 | 0.930 | 0.964 | 1.032 | 0.937                    | 0.968 | 0.937 | 0.968 |
|             | Chr6       | 1.051 | 0.949                    | 0.903 | 0.903 | 0.949 | 1.037 | 0.948                    | 0.948 | 0.929 | 0.963 | 1.033 | 0.936                    | 0.967 | 0.936 | 0.967 |
|             | Chr7       | 1.059 | 0.941                    | 0.889 | 0.889 | 0.941 | 1.036 | 0.949                    | 0.949 | 0.930 | 0.964 | 1.028 | 0.946                    | 0.972 | 0.946 | 0.972 |
|             | Chr8       | 1.052 | 0.948                    | 0.901 | 0.901 | 0.948 | 1.037 | 0.948                    | 0.948 | 0.929 | 0.963 | 1.021 | 0.958                    | 0.979 | 0.958 | 0.979 |
|             | Chr9       | 1.058 | 0.942                    | 0.891 | 0.891 | 0.942 | 1.035 | 0.950                    | 0.950 | 0.932 | 0.965 | 1.025 | 0.952                    | 0.975 | 0.952 | 0.975 |
|             | Chr10      | 1.052 | 0.948                    | 0.901 | 0.901 | 0.948 | 1.035 | 0.950                    | 0.950 | 0.932 | 0.965 | 1.027 | 0.948                    | 0.973 | 0.948 | 0.973 |
|             | Chr11      | 1.051 | 0.949                    | 0.903 | 0.903 | 0.949 | 1.033 | 0.953                    | 0.953 | 0.936 | 0.967 | 1.026 | 0.949                    | 0.974 | 0.949 | 0.974 |
|             | Chr12      | 1.048 | 0.952                    | 0.909 | 0.909 | 0.952 | 1.035 | 0.950                    | 0.950 | 0.932 | 0.965 | 1.032 | 0.937                    | 0.968 | 0.937 | 0.968 |
|             | Chr13      | 1.042 | 0.958                    | 0.919 | 0.919 | 0.958 | 1.025 | 0.964                    | 0.964 | 0.951 | 0.975 | 1.022 | 0.957                    | 0.978 | 0.957 | 0.978 |
|             | Chr14      | 1.062 | 0.938                    | 0.884 | 0.884 | 0.938 | 1.036 | 0.949                    | 0.949 | 0.930 | 0.964 | 1.028 | 0.945                    | 0.972 | 0.945 | 0.972 |
|             | Chr15      | 1.055 | 0.945                    | 0.895 | 0.895 | 0.945 | 1.034 | 0.952                    | 0.952 | 0.935 | 0.966 | 1.029 | 0.943                    | 0.971 | 0.943 | 0.971 |
|             | Chr16      | 1.063 | 0.937                    | 0.881 | 0.881 | 0.937 | 1.035 | 0.951                    | 0.951 | 0.933 | 0.965 | 1.015 | 0.970                    | 0.985 | 0.970 | 0.985 |
|             | Chr17      | 1.062 | 0.938                    | 0.883 | 0.883 | 0.938 | 1.043 | 0.939                    | 0.939 | 0.917 | 0.957 | 1.036 | 0.931                    | 0.964 | 0.931 | 0.964 |
|             | Chr18      | 1.042 | 0.958                    | 0.919 | 0.919 | 0.958 | 1.027 | 0.961                    | 0.961 | 0.947 | 0.973 | 1.026 | 0.948                    | 0.974 | 0.948 | 0.974 |
|             | Chr19      | 1.062 | 0.938                    | 0.884 | 0.884 | 0.938 | 1.060 | 0.916                    | 0.916 | 0.887 | 0.940 | 1.052 | 0.901                    | 0.948 | 0.901 | 0.948 |
|             | Chr20      | 1.052 | 0.948                    | 0.900 | 0.900 | 0.948 | 1.042 | 0.941                    | 0.941 | 0.920 | 0.958 | 1.027 | 0.948                    | 0.973 | 0.948 | 0.973 |
|             | Chr21      | 1.047 | 0.953                    | 0.911 | 0.911 | 0.953 | 1.031 | 0.957                    | 0.957 | 0.941 | 0.969 | 1.031 | 0.941                    | 0.969 | 0.941 | 0.969 |
|             | Chr22      | 1.062 | 0.938                    | 0.883 | 0.883 | 0.938 | 1.041 | 0.942                    | 0.942 | 0.921 | 0.959 | 1.031 | 0.940                    | 0.969 | 0.940 | 0.969 |
| ChrX        | 1.497      | 0.503 | 0.463                    | 0.463 | 0.503 | 1.452 | 0.523 | 0.523                    | 0.498 | 0.548 | 1.445 | 0.500 | 0.555                    | 0.500 | 0.555 |       |
| ChrY        | 1.403      | 0.597 | 0.477                    | 0.477 | 0.597 | 1.337 | 0.611 | 0.611                    | 0.559 | 0.663 | 1.347 | 0.558 | 0.653                    | 0.558 | 0.653 |       |
| AFR vs. EUR | Chr1       | 1.057 | 0.943                    | 0.892 | 0.892 | 0.943 | 1.039 | 0.944                    | 0.944 | 0.924 | 0.961 | 1.031 | 0.940                    | 0.969 | 0.940 | 0.969 |
|             | Chr2       | 1.057 | 0.943                    | 0.892 | 0.892 | 0.943 | 1.039 | 0.945                    | 0.945 | 0.925 | 0.961 | 1.033 | 0.936                    | 0.967 | 0.936 | 0.967 |
|             | Chr3       | 1.050 | 0.950                    | 0.904 | 0.904 | 0.950 | 1.038 | 0.946                    | 0.946 | 0.927 | 0.962 | 1.031 | 0.939                    | 0.969 | 0.939 | 0.969 |
|             | Chr4       | 1.045 | 0.955                    | 0.914 | 0.914 | 0.955 | 1.036 | 0.949                    | 0.949 | 0.931 | 0.964 | 1.033 | 0.936                    | 0.967 | 0.936 | 0.967 |
|             | Chr5       | 1.054 | 0.946                    | 0.898 | 0.898 | 0.946 | 1.038 | 0.946                    | 0.946 | 0.926 | 0.962 | 1.035 | 0.932                    | 0.965 | 0.932 | 0.965 |
|             | Chr6       | 1.056 | 0.944                    | 0.893 | 0.893 | 0.944 | 1.041 | 0.943                    | 0.943 | 0.922 | 0.959 | 1.036 | 0.931                    | 0.964 | 0.931 | 0.964 |
|             | Chr7       | 1.061 | 0.939                    | 0.886 | 0.886 | 0.939 | 1.039 | 0.945                    | 0.945 | 0.925 | 0.961 | 1.031 | 0.939                    | 0.969 | 0.939 | 0.969 |
|             | Chr8       | 1.054 | 0.946                    | 0.898 | 0.898 | 0.946 | 1.039 | 0.945                    | 0.945 | 0.925 | 0.961 | 1.022 | 0.956                    | 0.978 | 0.956 | 0.978 |
|             | Chr9       | 1.059 | 0.941                    | 0.888 | 0.888 | 0.941 | 1.038 | 0.946                    | 0.946 | 0.927 | 0.962 | 1.029 | 0.944                    | 0.971 | 0.944 | 0.971 |
|             | Chr10      | 1.055 | 0.945                    | 0.896 | 0.896 | 0.945 | 1.037 | 0.947                    | 0.947 | 0.928 | 0.963 | 1.030 | 0.943                    | 0.970 | 0.943 | 0.970 |
|             | Chr11      | 1.052 | 0.948                    | 0.902 | 0.902 | 0.948 | 1.034 | 0.952                    | 0.952 | 0.935 | 0.966 | 1.026 | 0.949                    | 0.974 | 0.949 | 0.974 |
|             | Chr12      | 1.049 | 0.951                    | 0.906 | 0.906 | 0.951 | 1.037 | 0.948                    | 0.948 | 0.929 | 0.963 | 1.034 | 0.934                    | 0.966 | 0.934 | 0.966 |
|             | Chr13      | 1.044 | 0.956                    | 0.916 | 0.916 | 0.956 | 1.027 | 0.962                    | 0.962 | 0.948 | 0.973 | 1.024 | 0.953                    | 0.976 | 0.953 | 0.976 |
|             | Chr14      | 1.064 | 0.936                    | 0.879 | 0.879 | 0.936 | 1.040 | 0.943                    | 0.943 | 0.923 | 0.960 | 1.035 | 0.933                    | 0.965 | 0.933 | 0.965 |
|             | Chr15      | 1.057 | 0.943                    | 0.892 | 0.892 | 0.943 | 1.036 | 0.950                    | 0.950 | 0.931 | 0.964 | 1.030 | 0.941                    | 0.970 | 0.941 | 0.970 |
|             | Chr16      | 1.065 | 0.935                    | 0.878 | 0.878 | 0.935 | 1.037 | 0.947                    | 0.947 | 0.928 | 0.963 | 1.017 | 0.967                    | 0.983 | 0.967 | 0.983 |
|             | Chr17      | 1.065 | 0.935                    | 0.879 | 0.879 | 0.935 | 1.047 | 0.934                    | 0.934 | 0.910 | 0.953 | 1.039 | 0.925                    | 0.961 | 0.925 | 0.961 |
|             | Chr18      | 1.044 | 0.956                    | 0.916 | 0.916 | 0.956 | 1.029 | 0.958                    | 0.958 | 0.943 | 0.971 | 1.030 | 0.943                    | 0.970 | 0.943 | 0.970 |
|             | Chr19      | 1.064 | 0.936                    | 0.879 | 0.879 | 0.936 | 1.064 | 0.911                    | 0.911 | 0.880 | 0.936 | 1.056 | 0.894                    | 0.944 | 0.894 | 0.944 |
|             | Chr20      | 1.055 | 0.945                    | 0.896 | 0.896 | 0.945 | 1.045 | 0.936                    | 0.936 | 0.914 | 0.955 | 1.030 | 0.941                    | 0.970 | 0.941 | 0.970 |
|             | Chr21      | 1.047 | 0.953                    | 0.910 | 0.910 | 0.953 | 1.032 | 0.955                    | 0.955 | 0.938 | 0.968 | 1.031 | 0.939                    | 0.969 | 0.939 | 0.969 |
|             | Chr22      | 1.066 | 0.934                    | 0.877 | 0.877 | 0.934 | 1.045 | 0.937                    | 0.937 | 0.915 | 0.955 | 1.037 | 0.928                    | 0.963 | 0.928 | 0.963 |
| ChrX        | 1.500      | 0.500 | 0.457                    | 0.457 | 0.500 | 1.454 | 0.519 | 0.519                    | 0.493 | 0.546 | 1.445 | 0.494 | 0.555                    | 0.494 | 0.555 |       |
| ChrY        | 1.436      | 0.564 | 0.442                    | 0.442 | 0.564 | 1.365 | 0.582 | 0.582                    | 0.529 | 0.635 | 1.374 | 0.528 | 0.626                    | 0.528 | 0.626 |       |
| AFR vs. EAS | Chr1       | 1.055 | 0.945                    | 0.896 | 0.896 | 0.945 | 1.037 | 0.947                    | 0.947 | 0.928 | 0.963 | 1.030 | 0.942                    | 0.970 | 0.942 | 0.970 |
|             | Chr2       | 1.057 | 0.943                    | 0.892 | 0.892 | 0.943 | 1.039 | 0.945                    | 0.945 | 0.926 | 0.961 | 1.032 | 0.938                    | 0.968 | 0.938 | 0.968 |
|             | Chr3       | 1.051 | 0.949                    | 0.904 | 0.904 | 0.949 | 1.037 | 0.948                    | 0.948 | 0.929 | 0.963 | 1.031 | 0.940                    | 0.969 | 0.940 | 0.969 |

|             |       |       |       |       |       |       |       |       |       |       |       |       |       |       |       |       |
|-------------|-------|-------|-------|-------|-------|-------|-------|-------|-------|-------|-------|-------|-------|-------|-------|-------|
|             | Chr4  | 1.044 | 0.956 | 0.915 | 0.915 | 0.956 | 1.034 | 0.952 | 0.952 | 0.934 | 0.966 | 1.030 | 0.941 | 0.970 | 0.941 | 0.970 |
|             | Chr5  | 1.056 | 0.944 | 0.893 | 0.893 | 0.944 | 1.043 | 0.940 | 0.940 | 0.918 | 0.957 | 1.038 | 0.926 | 0.962 | 0.926 | 0.962 |
|             | Chr6  | 1.052 | 0.948 | 0.901 | 0.901 | 0.948 | 1.038 | 0.946 | 0.946 | 0.927 | 0.962 | 1.033 | 0.935 | 0.967 | 0.935 | 0.967 |
|             | Chr7  | 1.062 | 0.938 | 0.884 | 0.884 | 0.938 | 1.038 | 0.947 | 0.947 | 0.928 | 0.962 | 1.031 | 0.940 | 0.969 | 0.940 | 0.969 |
|             | Chr8  | 1.054 | 0.946 | 0.897 | 0.897 | 0.946 | 1.040 | 0.944 | 0.944 | 0.924 | 0.960 | 1.024 | 0.953 | 0.976 | 0.953 | 0.976 |
|             | Chr9  | 1.058 | 0.942 | 0.890 | 0.890 | 0.942 | 1.036 | 0.948 | 0.948 | 0.930 | 0.964 | 1.027 | 0.947 | 0.973 | 0.947 | 0.973 |
|             | Chr10 | 1.053 | 0.947 | 0.899 | 0.899 | 0.947 | 1.038 | 0.947 | 0.947 | 0.928 | 0.962 | 1.029 | 0.943 | 0.971 | 0.943 | 0.971 |
|             | Chr11 | 1.053 | 0.947 | 0.899 | 0.899 | 0.947 | 1.035 | 0.950 | 0.950 | 0.932 | 0.965 | 1.027 | 0.947 | 0.973 | 0.947 | 0.973 |
|             | Chr12 | 1.048 | 0.952 | 0.909 | 0.909 | 0.952 | 1.036 | 0.949 | 0.949 | 0.931 | 0.964 | 1.035 | 0.933 | 0.965 | 0.933 | 0.965 |
|             | Chr13 | 1.044 | 0.956 | 0.915 | 0.915 | 0.956 | 1.027 | 0.962 | 0.962 | 0.948 | 0.973 | 1.023 | 0.955 | 0.977 | 0.955 | 0.977 |
|             | Chr14 | 1.064 | 0.936 | 0.880 | 0.880 | 0.936 | 1.037 | 0.948 | 0.948 | 0.929 | 0.963 | 1.028 | 0.946 | 0.972 | 0.946 | 0.972 |
|             | Chr15 | 1.056 | 0.944 | 0.894 | 0.894 | 0.944 | 1.035 | 0.950 | 0.950 | 0.932 | 0.965 | 1.031 | 0.940 | 0.969 | 0.940 | 0.969 |
|             | Chr16 | 1.066 | 0.934 | 0.876 | 0.876 | 0.934 | 1.036 | 0.948 | 0.948 | 0.930 | 0.964 | 1.016 | 0.969 | 0.984 | 0.969 | 0.984 |
|             | Chr17 | 1.067 | 0.933 | 0.875 | 0.875 | 0.933 | 1.047 | 0.933 | 0.933 | 0.910 | 0.953 | 1.038 | 0.926 | 0.962 | 0.926 | 0.962 |
|             | Chr18 | 1.044 | 0.956 | 0.915 | 0.915 | 0.956 | 1.028 | 0.961 | 0.961 | 0.946 | 0.972 | 1.027 | 0.947 | 0.973 | 0.947 | 0.973 |
|             | Chr19 | 1.066 | 0.934 | 0.877 | 0.877 | 0.934 | 1.066 | 0.908 | 0.908 | 0.876 | 0.934 | 1.057 | 0.892 | 0.943 | 0.892 | 0.943 |
|             | Chr20 | 1.055 | 0.945 | 0.895 | 0.895 | 0.945 | 1.042 | 0.940 | 0.940 | 0.919 | 0.958 | 1.028 | 0.946 | 0.972 | 0.946 | 0.972 |
|             | Chr21 | 1.050 | 0.950 | 0.906 | 0.906 | 0.950 | 1.033 | 0.954 | 0.954 | 0.937 | 0.967 | 1.034 | 0.935 | 0.966 | 0.935 | 0.966 |
|             | Chr22 | 1.067 | 0.933 | 0.875 | 0.875 | 0.933 | 1.044 | 0.937 | 0.937 | 0.915 | 0.956 | 1.036 | 0.931 | 0.964 | 0.931 | 0.964 |
|             | ChrX  | 1.497 | 0.503 | 0.463 | 0.463 | 0.503 | 1.453 | 0.522 | 0.522 | 0.498 | 0.547 | 1.450 | 0.495 | 0.550 | 0.495 | 0.550 |
|             | ChrY  | 1.176 | 0.824 | 0.711 | 0.711 | 0.824 | 1.100 | 0.868 | 0.868 | 0.831 | 0.900 | 1.092 | 0.844 | 0.908 | 0.844 | 0.908 |
| AFR vs. SAS | Chr1  | 1.055 | 0.945 | 0.896 | 0.896 | 0.945 | 1.037 | 0.947 | 0.947 | 0.928 | 0.963 | 1.029 | 0.944 | 0.971 | 0.944 | 0.971 |
|             | Chr2  | 1.056 | 0.944 | 0.895 | 0.895 | 0.944 | 1.037 | 0.948 | 0.948 | 0.930 | 0.963 | 1.030 | 0.941 | 0.970 | 0.941 | 0.970 |
|             | Chr3  | 1.050 | 0.950 | 0.905 | 0.905 | 0.950 | 1.036 | 0.950 | 0.950 | 0.931 | 0.964 | 1.030 | 0.943 | 0.970 | 0.943 | 0.970 |
|             | Chr4  | 1.043 | 0.957 | 0.917 | 0.917 | 0.957 | 1.033 | 0.953 | 0.953 | 0.936 | 0.967 | 1.029 | 0.943 | 0.971 | 0.943 | 0.971 |
|             | Chr5  | 1.052 | 0.948 | 0.900 | 0.900 | 0.948 | 1.036 | 0.948 | 0.948 | 0.930 | 0.964 | 1.033 | 0.936 | 0.967 | 0.936 | 0.967 |
|             | Chr6  | 1.052 | 0.948 | 0.900 | 0.900 | 0.948 | 1.037 | 0.947 | 0.947 | 0.928 | 0.963 | 1.033 | 0.935 | 0.967 | 0.935 | 0.967 |
|             | Chr7  | 1.059 | 0.941 | 0.888 | 0.888 | 0.941 | 1.036 | 0.949 | 0.949 | 0.931 | 0.964 | 1.027 | 0.947 | 0.973 | 0.947 | 0.973 |
|             | Chr8  | 1.051 | 0.949 | 0.902 | 0.902 | 0.949 | 1.036 | 0.949 | 0.949 | 0.930 | 0.964 | 1.021 | 0.959 | 0.979 | 0.959 | 0.979 |
|             | Chr9  | 1.057 | 0.943 | 0.893 | 0.893 | 0.943 | 1.035 | 0.951 | 0.951 | 0.933 | 0.965 | 1.025 | 0.951 | 0.975 | 0.951 | 0.975 |
|             | Chr10 | 1.054 | 0.946 | 0.898 | 0.898 | 0.946 | 1.035 | 0.950 | 0.950 | 0.932 | 0.965 | 1.027 | 0.947 | 0.973 | 0.947 | 0.973 |
|             | Chr11 | 1.051 | 0.949 | 0.903 | 0.903 | 0.949 | 1.032 | 0.954 | 0.954 | 0.937 | 0.968 | 1.024 | 0.952 | 0.976 | 0.952 | 0.976 |
|             | Chr12 | 1.046 | 0.954 | 0.911 | 0.911 | 0.954 | 1.035 | 0.951 | 0.951 | 0.933 | 0.965 | 1.033 | 0.937 | 0.967 | 0.937 | 0.967 |
|             | Chr13 | 1.043 | 0.957 | 0.917 | 0.917 | 0.957 | 1.026 | 0.964 | 0.964 | 0.950 | 0.974 | 1.021 | 0.958 | 0.979 | 0.958 | 0.979 |
|             | Chr14 | 1.062 | 0.938 | 0.883 | 0.883 | 0.938 | 1.036 | 0.950 | 0.950 | 0.931 | 0.964 | 1.027 | 0.947 | 0.973 | 0.947 | 0.973 |
|             | Chr15 | 1.056 | 0.944 | 0.893 | 0.893 | 0.944 | 1.034 | 0.951 | 0.951 | 0.934 | 0.966 | 1.029 | 0.943 | 0.971 | 0.943 | 0.971 |
|             | Chr16 | 1.061 | 0.939 | 0.885 | 0.885 | 0.939 | 1.034 | 0.952 | 0.952 | 0.935 | 0.966 | 1.015 | 0.971 | 0.985 | 0.971 | 0.985 |
|             | Chr17 | 1.062 | 0.938 | 0.883 | 0.883 | 0.938 | 1.044 | 0.938 | 0.938 | 0.916 | 0.956 | 1.036 | 0.930 | 0.964 | 0.930 | 0.964 |
|             | Chr18 | 1.043 | 0.957 | 0.917 | 0.917 | 0.957 | 1.027 | 0.961 | 0.961 | 0.947 | 0.973 | 1.027 | 0.948 | 0.973 | 0.948 | 0.973 |
|             | Chr19 | 1.061 | 0.939 | 0.886 | 0.886 | 0.939 | 1.059 | 0.918 | 0.918 | 0.889 | 0.941 | 1.052 | 0.902 | 0.948 | 0.902 | 0.948 |
|             | Chr20 | 1.052 | 0.948 | 0.901 | 0.901 | 0.948 | 1.041 | 0.943 | 0.943 | 0.922 | 0.959 | 1.028 | 0.946 | 0.972 | 0.946 | 0.972 |
|             | Chr21 | 1.047 | 0.953 | 0.910 | 0.910 | 0.953 | 1.030 | 0.958 | 0.958 | 0.943 | 0.970 | 1.029 | 0.943 | 0.971 | 0.943 | 0.971 |
| Chr22       | 1.062 | 0.938 | 0.883 | 0.883 | 0.938 | 1.041 | 0.943 | 0.943 | 0.922 | 0.959 | 1.030 | 0.941 | 0.970 | 0.941 | 0.970 |       |
| ChrX        | 1.495 | 0.505 | 0.466 | 0.466 | 0.505 | 1.451 | 0.524 | 0.524 | 0.501 | 0.549 | 1.446 | 0.500 | 0.554 | 0.500 | 0.554 |       |
| ChrY        | 1.219 | 0.781 | 0.653 | 0.653 | 0.781 | 1.138 | 0.819 | 0.819 | 0.770 | 0.862 | 1.145 | 0.764 | 0.855 | 0.764 | 0.855 |       |
| AMR vs. EUR | Chr1  | 1.051 | 0.949 | 0.902 | 0.902 | 0.949 | 1.033 | 0.953 | 0.953 | 0.936 | 0.967 | 1.024 | 0.953 | 0.976 | 0.953 | 0.976 |
|             | Chr2  | 1.053 | 0.947 | 0.898 | 0.898 | 0.947 | 1.034 | 0.952 | 0.952 | 0.934 | 0.966 | 1.025 | 0.951 | 0.975 | 0.951 | 0.975 |
|             | Chr3  | 1.047 | 0.953 | 0.910 | 0.910 | 0.953 | 1.033 | 0.953 | 0.953 | 0.936 | 0.967 | 1.024 | 0.953 | 0.976 | 0.953 | 0.976 |
|             | Chr4  | 1.040 | 0.960 | 0.923 | 0.923 | 0.960 | 1.030 | 0.957 | 0.957 | 0.942 | 0.970 | 1.024 | 0.952 | 0.976 | 0.952 | 0.976 |
|             | Chr5  | 1.051 | 0.949 | 0.903 | 0.903 | 0.949 | 1.034 | 0.952 | 0.952 | 0.934 | 0.966 | 1.027 | 0.947 | 0.973 | 0.947 | 0.973 |
|             | Chr6  | 1.055 | 0.945 | 0.897 | 0.897 | 0.945 | 1.037 | 0.948 | 0.948 | 0.929 | 0.963 | 1.029 | 0.943 | 0.971 | 0.943 | 0.971 |
|             | Chr7  | 1.059 | 0.941 | 0.889 | 0.889 | 0.941 | 1.034 | 0.952 | 0.952 | 0.934 | 0.966 | 1.022 | 0.956 | 0.978 | 0.956 | 0.978 |
|             | Chr8  | 1.050 | 0.950 | 0.905 | 0.905 | 0.950 | 1.033 | 0.953 | 0.953 | 0.936 | 0.967 | 1.016 | 0.969 | 0.984 | 0.969 | 0.984 |
|             | Chr9  | 1.055 | 0.945 | 0.896 | 0.896 | 0.945 | 1.032 | 0.954 | 0.954 | 0.938 | 0.968 | 1.020 | 0.961 | 0.980 | 0.961 | 0.980 |
|             | Chr10 | 1.051 | 0.949 | 0.903 | 0.903 | 0.949 | 1.033 | 0.953 | 0.953 | 0.936 | 0.967 | 1.023 | 0.955 | 0.977 | 0.955 | 0.977 |
|             | Chr11 | 1.047 | 0.953 | 0.910 | 0.910 | 0.953 | 1.029 | 0.959 | 0.959 | 0.943 | 0.971 | 1.020 | 0.961 | 0.980 | 0.961 | 0.980 |
|             | Chr12 | 1.045 | 0.955 | 0.913 | 0.913 | 0.955 | 1.032 | 0.955 | 0.955 | 0.938 | 0.968 | 1.027 | 0.948 | 0.973 | 0.948 | 0.973 |
|             | Chr13 | 1.038 | 0.962 | 0.927 | 0.927 | 0.962 | 1.022 | 0.969 | 0.969 | 0.957 | 0.978 | 1.019 | 0.963 | 0.981 | 0.963 | 0.981 |
|             | Chr14 | 1.057 | 0.943 | 0.892 | 0.892 | 0.943 | 1.034 | 0.952 | 0.952 | 0.935 | 0.966 | 1.027 | 0.948 | 0.973 | 0.948 | 0.973 |

|             |       |       |       |       |       |       |       |       |       |       |       |       |       |       |       |       |
|-------------|-------|-------|-------|-------|-------|-------|-------|-------|-------|-------|-------|-------|-------|-------|-------|-------|
|             | Chr15 | 1.052 | 0.948 | 0.902 | 0.902 | 0.948 | 1.030 | 0.957 | 0.957 | 0.942 | 0.970 | 1.023 | 0.955 | 0.977 | 0.955 | 0.977 |
|             | Chr16 | 1.062 | 0.938 | 0.884 | 0.884 | 0.938 | 1.032 | 0.955 | 0.955 | 0.939 | 0.968 | 1.011 | 0.979 | 0.989 | 0.979 | 0.989 |
|             | Chr17 | 1.061 | 0.939 | 0.886 | 0.886 | 0.939 | 1.042 | 0.941 | 0.941 | 0.920 | 0.958 | 1.030 | 0.942 | 0.970 | 0.942 | 0.970 |
|             | Chr18 | 1.038 | 0.962 | 0.926 | 0.926 | 0.962 | 1.025 | 0.965 | 0.965 | 0.952 | 0.975 | 1.022 | 0.958 | 0.978 | 0.958 | 0.978 |
|             | Chr19 | 1.065 | 0.935 | 0.878 | 0.878 | 0.935 | 1.059 | 0.917 | 0.917 | 0.889 | 0.941 | 1.047 | 0.910 | 0.953 | 0.910 | 0.953 |
|             | Chr20 | 1.054 | 0.946 | 0.898 | 0.898 | 0.946 | 1.040 | 0.944 | 0.944 | 0.924 | 0.960 | 1.021 | 0.959 | 0.979 | 0.959 | 0.979 |
|             | Chr21 | 1.045 | 0.955 | 0.914 | 0.914 | 0.955 | 1.027 | 0.961 | 0.961 | 0.947 | 0.973 | 1.023 | 0.956 | 0.977 | 0.956 | 0.977 |
|             | Chr22 | 1.065 | 0.935 | 0.878 | 0.878 | 0.935 | 1.041 | 0.943 | 0.943 | 0.922 | 0.959 | 1.026 | 0.949 | 0.974 | 0.949 | 0.974 |
|             | ChrX  | 1.491 | 0.509 | 0.467 | 0.467 | 0.509 | 1.440 | 0.535 | 0.535 | 0.511 | 0.560 | 1.430 | 0.520 | 0.570 | 0.520 | 0.570 |
| ChrY        | 1.474 | 0.526 | 0.386 | 0.386 | 0.526 | 1.345 | 0.594 | 0.594 | 0.531 | 0.655 | 1.298 | 0.605 | 0.702 | 0.605 | 0.702 |       |
| AMR vs. EAS | Chr1  | 1.050 | 0.950 | 0.904 | 0.904 | 0.950 | 1.032 | 0.954 | 0.954 | 0.937 | 0.968 | 1.024 | 0.954 | 0.976 | 0.954 | 0.976 |
|             | Chr2  | 1.053 | 0.947 | 0.899 | 0.899 | 0.947 | 1.034 | 0.952 | 0.952 | 0.935 | 0.966 | 1.025 | 0.952 | 0.975 | 0.952 | 0.975 |
|             | Chr3  | 1.047 | 0.953 | 0.910 | 0.910 | 0.953 | 1.033 | 0.954 | 0.954 | 0.937 | 0.967 | 1.024 | 0.954 | 0.976 | 0.954 | 0.976 |
|             | Chr4  | 1.041 | 0.959 | 0.922 | 0.922 | 0.959 | 1.030 | 0.958 | 0.958 | 0.942 | 0.970 | 1.024 | 0.953 | 0.976 | 0.953 | 0.976 |
|             | Chr5  | 1.054 | 0.946 | 0.897 | 0.897 | 0.946 | 1.037 | 0.947 | 0.947 | 0.928 | 0.963 | 1.029 | 0.943 | 0.971 | 0.943 | 0.971 |
|             | Chr6  | 1.050 | 0.950 | 0.904 | 0.904 | 0.950 | 1.035 | 0.950 | 0.950 | 0.932 | 0.965 | 1.029 | 0.944 | 0.971 | 0.944 | 0.971 |
|             | Chr7  | 1.059 | 0.941 | 0.889 | 0.889 | 0.941 | 1.033 | 0.953 | 0.953 | 0.935 | 0.967 | 1.022 | 0.956 | 0.978 | 0.956 | 0.978 |
|             | Chr8  | 1.049 | 0.951 | 0.907 | 0.907 | 0.951 | 1.033 | 0.953 | 0.953 | 0.936 | 0.967 | 1.016 | 0.969 | 0.984 | 0.969 | 0.984 |
|             | Chr9  | 1.056 | 0.944 | 0.895 | 0.895 | 0.944 | 1.033 | 0.954 | 0.954 | 0.937 | 0.967 | 1.020 | 0.961 | 0.980 | 0.961 | 0.980 |
|             | Chr10 | 1.051 | 0.949 | 0.903 | 0.903 | 0.949 | 1.034 | 0.952 | 0.952 | 0.935 | 0.966 | 1.023 | 0.954 | 0.977 | 0.954 | 0.977 |
|             | Chr11 | 1.048 | 0.952 | 0.908 | 0.908 | 0.952 | 1.030 | 0.957 | 0.957 | 0.942 | 0.970 | 1.021 | 0.960 | 0.979 | 0.960 | 0.979 |
|             | Chr12 | 1.045 | 0.955 | 0.914 | 0.914 | 0.955 | 1.032 | 0.954 | 0.954 | 0.937 | 0.968 | 1.028 | 0.945 | 0.972 | 0.945 | 0.972 |
|             | Chr13 | 1.039 | 0.961 | 0.925 | 0.925 | 0.961 | 1.022 | 0.968 | 0.968 | 0.956 | 0.978 | 1.018 | 0.964 | 0.982 | 0.964 | 0.982 |
|             | Chr14 | 1.059 | 0.941 | 0.888 | 0.888 | 0.941 | 1.035 | 0.951 | 0.951 | 0.933 | 0.965 | 1.026 | 0.950 | 0.974 | 0.950 | 0.974 |
|             | Chr15 | 1.052 | 0.948 | 0.901 | 0.901 | 0.948 | 1.030 | 0.957 | 0.957 | 0.941 | 0.970 | 1.023 | 0.955 | 0.977 | 0.955 | 0.977 |
|             | Chr16 | 1.062 | 0.938 | 0.883 | 0.883 | 0.938 | 1.031 | 0.955 | 0.955 | 0.939 | 0.969 | 1.010 | 0.980 | 0.990 | 0.980 | 0.990 |
|             | Chr17 | 1.063 | 0.937 | 0.881 | 0.881 | 0.937 | 1.042 | 0.941 | 0.941 | 0.919 | 0.958 | 1.030 | 0.942 | 0.970 | 0.942 | 0.970 |
|             | Chr18 | 1.039 | 0.961 | 0.925 | 0.925 | 0.961 | 1.024 | 0.966 | 0.966 | 0.953 | 0.976 | 1.021 | 0.959 | 0.979 | 0.959 | 0.979 |
|             | Chr19 | 1.068 | 0.932 | 0.873 | 0.873 | 0.932 | 1.062 | 0.913 | 0.913 | 0.883 | 0.938 | 1.049 | 0.906 | 0.951 | 0.906 | 0.951 |
|             | Chr20 | 1.054 | 0.946 | 0.897 | 0.897 | 0.946 | 1.038 | 0.946 | 0.946 | 0.927 | 0.962 | 1.020 | 0.961 | 0.980 | 0.961 | 0.980 |
|             | Chr21 | 1.048 | 0.952 | 0.909 | 0.909 | 0.952 | 1.028 | 0.960 | 0.960 | 0.945 | 0.972 | 1.024 | 0.954 | 0.976 | 0.954 | 0.976 |
| Chr22       | 1.067 | 0.933 | 0.875 | 0.875 | 0.933 | 1.040 | 0.943 | 0.943 | 0.923 | 0.960 | 1.025 | 0.951 | 0.975 | 0.951 | 0.975 |       |
| ChrX        | 1.499 | 0.501 | 0.462 | 0.462 | 0.501 | 1.448 | 0.528 | 0.528 | 0.505 | 0.552 | 1.441 | 0.510 | 0.559 | 0.510 | 0.559 |       |
| ChrY        | 1.392 | 0.608 | 0.480 | 0.480 | 0.608 | 1.308 | 0.637 | 0.637 | 0.582 | 0.692 | 1.289 | 0.612 | 0.711 | 0.612 | 0.711 |       |
| AMR vs. SAS | Chr1  | 1.051 | 0.949 | 0.903 | 0.903 | 0.949 | 1.033 | 0.953 | 0.953 | 0.936 | 0.967 | 1.024 | 0.953 | 0.976 | 0.953 | 0.976 |
|             | Chr2  | 1.053 | 0.947 | 0.899 | 0.899 | 0.947 | 1.033 | 0.953 | 0.953 | 0.935 | 0.967 | 1.024 | 0.952 | 0.976 | 0.952 | 0.976 |
|             | Chr3  | 1.047 | 0.953 | 0.910 | 0.910 | 0.953 | 1.032 | 0.954 | 0.954 | 0.937 | 0.968 | 1.023 | 0.954 | 0.977 | 0.954 | 0.977 |
|             | Chr4  | 1.040 | 0.960 | 0.923 | 0.923 | 0.960 | 1.030 | 0.958 | 0.958 | 0.942 | 0.970 | 1.024 | 0.953 | 0.976 | 0.953 | 0.976 |
|             | Chr5  | 1.051 | 0.949 | 0.902 | 0.902 | 0.949 | 1.034 | 0.952 | 0.952 | 0.934 | 0.966 | 1.027 | 0.947 | 0.973 | 0.947 | 0.973 |
|             | Chr6  | 1.052 | 0.948 | 0.901 | 0.901 | 0.948 | 1.036 | 0.949 | 0.949 | 0.931 | 0.964 | 1.029 | 0.944 | 0.971 | 0.944 | 0.971 |
|             | Chr7  | 1.058 | 0.942 | 0.890 | 0.890 | 0.942 | 1.033 | 0.953 | 0.953 | 0.935 | 0.967 | 1.021 | 0.958 | 0.979 | 0.958 | 0.979 |
|             | Chr8  | 1.049 | 0.951 | 0.906 | 0.906 | 0.951 | 1.033 | 0.954 | 0.954 | 0.937 | 0.967 | 1.016 | 0.969 | 0.984 | 0.969 | 0.984 |
|             | Chr9  | 1.055 | 0.945 | 0.896 | 0.896 | 0.945 | 1.032 | 0.955 | 0.955 | 0.938 | 0.968 | 1.020 | 0.961 | 0.980 | 0.961 | 0.980 |
|             | Chr10 | 1.051 | 0.949 | 0.902 | 0.902 | 0.949 | 1.033 | 0.953 | 0.953 | 0.936 | 0.967 | 1.022 | 0.956 | 0.978 | 0.956 | 0.978 |
|             | Chr11 | 1.047 | 0.953 | 0.910 | 0.910 | 0.953 | 1.029 | 0.959 | 0.959 | 0.943 | 0.971 | 1.020 | 0.961 | 0.980 | 0.961 | 0.980 |
|             | Chr12 | 1.045 | 0.955 | 0.915 | 0.915 | 0.955 | 1.032 | 0.955 | 0.955 | 0.939 | 0.968 | 1.027 | 0.947 | 0.973 | 0.947 | 0.973 |
|             | Chr13 | 1.039 | 0.961 | 0.926 | 0.926 | 0.961 | 1.022 | 0.969 | 0.969 | 0.957 | 0.978 | 1.018 | 0.964 | 0.982 | 0.964 | 0.982 |
|             | Chr14 | 1.057 | 0.943 | 0.891 | 0.891 | 0.943 | 1.033 | 0.953 | 0.953 | 0.936 | 0.967 | 1.024 | 0.952 | 0.976 | 0.952 | 0.976 |
|             | Chr15 | 1.053 | 0.947 | 0.900 | 0.900 | 0.947 | 1.030 | 0.957 | 0.957 | 0.941 | 0.970 | 1.024 | 0.954 | 0.976 | 0.954 | 0.976 |
|             | Chr16 | 1.061 | 0.939 | 0.886 | 0.886 | 0.939 | 1.031 | 0.956 | 0.956 | 0.941 | 0.969 | 1.010 | 0.980 | 0.990 | 0.980 | 0.990 |
|             | Chr17 | 1.061 | 0.939 | 0.886 | 0.886 | 0.939 | 1.040 | 0.943 | 0.943 | 0.923 | 0.960 | 1.029 | 0.943 | 0.971 | 0.943 | 0.971 |
|             | Chr18 | 1.039 | 0.961 | 0.925 | 0.925 | 0.961 | 1.024 | 0.965 | 0.965 | 0.952 | 0.976 | 1.021 | 0.959 | 0.979 | 0.959 | 0.979 |
|             | Chr19 | 1.064 | 0.936 | 0.880 | 0.880 | 0.936 | 1.058 | 0.918 | 0.918 | 0.890 | 0.942 | 1.048 | 0.909 | 0.952 | 0.909 | 0.952 |
|             | Chr20 | 1.053 | 0.947 | 0.900 | 0.900 | 0.947 | 1.038 | 0.946 | 0.946 | 0.927 | 0.962 | 1.020 | 0.960 | 0.980 | 0.960 | 0.980 |
|             | Chr21 | 1.045 | 0.955 | 0.913 | 0.913 | 0.955 | 1.027 | 0.962 | 0.962 | 0.947 | 0.973 | 1.022 | 0.956 | 0.978 | 0.956 | 0.978 |
| Chr22       | 1.064 | 0.936 | 0.880 | 0.880 | 0.936 | 1.039 | 0.944 | 0.944 | 0.924 | 0.961 | 1.024 | 0.953 | 0.976 | 0.953 | 0.976 |       |
| ChrX        | 1.500 | 0.500 | 0.461 | 0.461 | 0.500 | 1.449 | 0.527 | 0.527 | 0.504 | 0.551 | 1.440 | 0.512 | 0.560 | 0.512 | 0.560 |       |
| ChrY        | 1.395 | 0.605 | 0.470 | 0.470 | 0.605 | 1.297 | 0.645 | 0.645 | 0.585 | 0.703 | 1.264 | 0.630 | 0.736 | 0.630 | 0.736 |       |
| EUR vs. EAS | Chr1  | 1.053 | 0.947 | 0.899 | 0.899 | 0.947 | 1.035 | 0.951 | 0.951 | 0.933 | 0.965 | 1.025 | 0.952 | 0.975 | 0.952 | 0.975 |

|             |       |       |       |       |       |       |       |       |       |       |       |       |       |       |       |       |
|-------------|-------|-------|-------|-------|-------|-------|-------|-------|-------|-------|-------|-------|-------|-------|-------|-------|
|             | Chr2  | 1.056 | 0.944 | 0.893 | 0.893 | 0.944 | 1.036 | 0.948 | 0.948 | 0.930 | 0.964 | 1.026 | 0.949 | 0.974 | 0.949 | 0.974 |
|             | Chr3  | 1.049 | 0.951 | 0.906 | 0.906 | 0.951 | 1.034 | 0.951 | 0.951 | 0.933 | 0.966 | 1.024 | 0.953 | 0.976 | 0.953 | 0.976 |
|             | Chr4  | 1.042 | 0.958 | 0.920 | 0.920 | 0.958 | 1.031 | 0.956 | 0.956 | 0.940 | 0.969 | 1.025 | 0.952 | 0.975 | 0.952 | 0.975 |
|             | Chr5  | 1.056 | 0.944 | 0.894 | 0.894 | 0.944 | 1.039 | 0.945 | 0.945 | 0.925 | 0.961 | 1.030 | 0.942 | 0.970 | 0.942 | 0.970 |
|             | Chr6  | 1.055 | 0.945 | 0.895 | 0.895 | 0.945 | 1.038 | 0.946 | 0.946 | 0.927 | 0.962 | 1.031 | 0.941 | 0.969 | 0.941 | 0.969 |
|             | Chr7  | 1.061 | 0.939 | 0.885 | 0.885 | 0.939 | 1.035 | 0.950 | 0.950 | 0.932 | 0.965 | 1.023 | 0.956 | 0.977 | 0.956 | 0.977 |
|             | Chr8  | 1.051 | 0.949 | 0.903 | 0.903 | 0.949 | 1.035 | 0.951 | 0.951 | 0.933 | 0.965 | 1.016 | 0.969 | 0.984 | 0.969 | 0.984 |
|             | Chr9  | 1.058 | 0.942 | 0.891 | 0.891 | 0.942 | 1.034 | 0.951 | 0.951 | 0.933 | 0.966 | 1.021 | 0.960 | 0.979 | 0.960 | 0.979 |
|             | Chr10 | 1.054 | 0.946 | 0.898 | 0.898 | 0.946 | 1.035 | 0.950 | 0.950 | 0.931 | 0.965 | 1.024 | 0.952 | 0.976 | 0.952 | 0.976 |
|             | Chr11 | 1.050 | 0.950 | 0.905 | 0.905 | 0.950 | 1.031 | 0.956 | 0.956 | 0.940 | 0.969 | 1.020 | 0.960 | 0.980 | 0.960 | 0.980 |
|             | Chr12 | 1.047 | 0.953 | 0.910 | 0.910 | 0.953 | 1.034 | 0.951 | 0.951 | 0.934 | 0.966 | 1.029 | 0.943 | 0.971 | 0.943 | 0.971 |
|             | Chr13 | 1.041 | 0.959 | 0.922 | 0.922 | 0.959 | 1.023 | 0.967 | 0.967 | 0.954 | 0.977 | 1.019 | 0.962 | 0.981 | 0.962 | 0.981 |
|             | Chr14 | 1.061 | 0.939 | 0.885 | 0.885 | 0.939 | 1.037 | 0.948 | 0.948 | 0.929 | 0.963 | 1.028 | 0.946 | 0.972 | 0.946 | 0.972 |
|             | Chr15 | 1.055 | 0.945 | 0.896 | 0.896 | 0.945 | 1.033 | 0.954 | 0.954 | 0.937 | 0.967 | 1.024 | 0.953 | 0.976 | 0.953 | 0.976 |
|             | Chr16 | 1.064 | 0.936 | 0.880 | 0.880 | 0.936 | 1.033 | 0.954 | 0.954 | 0.937 | 0.967 | 1.010 | 0.980 | 0.990 | 0.980 | 0.990 |
|             | Chr17 | 1.066 | 0.934 | 0.876 | 0.876 | 0.934 | 1.044 | 0.938 | 0.938 | 0.916 | 0.956 | 1.030 | 0.941 | 0.970 | 0.941 | 0.970 |
|             | Chr18 | 1.041 | 0.959 | 0.922 | 0.922 | 0.959 | 1.025 | 0.964 | 0.964 | 0.951 | 0.975 | 1.021 | 0.958 | 0.979 | 0.958 | 0.979 |
|             | Chr19 | 1.071 | 0.929 | 0.868 | 0.868 | 0.929 | 1.064 | 0.910 | 0.910 | 0.879 | 0.936 | 1.051 | 0.904 | 0.949 | 0.904 | 0.949 |
|             | Chr20 | 1.056 | 0.944 | 0.893 | 0.893 | 0.944 | 1.041 | 0.943 | 0.943 | 0.922 | 0.959 | 1.021 | 0.960 | 0.979 | 0.960 | 0.979 |
|             | Chr21 | 1.049 | 0.951 | 0.907 | 0.907 | 0.951 | 1.029 | 0.958 | 0.958 | 0.943 | 0.971 | 1.024 | 0.953 | 0.976 | 0.953 | 0.976 |
|             | Chr22 | 1.070 | 0.930 | 0.870 | 0.870 | 0.930 | 1.042 | 0.940 | 0.940 | 0.919 | 0.958 | 1.027 | 0.948 | 0.973 | 0.948 | 0.973 |
| ChrX        | 1.502 | 0.498 | 0.457 | 0.457 | 0.498 | 1.449 | 0.526 | 0.526 | 0.502 | 0.551 | 1.439 | 0.511 | 0.561 | 0.511 | 0.561 |       |
| ChrY        | 1.411 | 0.589 | 0.467 | 0.467 | 0.589 | 1.329 | 0.618 | 0.618 | 0.565 | 0.671 | 1.306 | 0.599 | 0.694 | 0.599 | 0.694 |       |
| EUR vs. SAS | Chr1  | 1.052 | 0.948 | 0.902 | 0.902 | 0.948 | 1.033 | 0.953 | 0.953 | 0.936 | 0.967 | 1.024 | 0.954 | 0.976 | 0.954 | 0.976 |
|             | Chr2  | 1.054 | 0.946 | 0.898 | 0.898 | 0.946 | 1.034 | 0.952 | 0.952 | 0.935 | 0.966 | 1.024 | 0.953 | 0.976 | 0.953 | 0.976 |
|             | Chr3  | 1.047 | 0.953 | 0.910 | 0.910 | 0.953 | 1.033 | 0.953 | 0.953 | 0.936 | 0.967 | 1.023 | 0.955 | 0.977 | 0.955 | 0.977 |
|             | Chr4  | 1.040 | 0.960 | 0.923 | 0.923 | 0.960 | 1.030 | 0.958 | 0.958 | 0.942 | 0.970 | 1.024 | 0.953 | 0.976 | 0.953 | 0.976 |
|             | Chr5  | 1.051 | 0.949 | 0.903 | 0.903 | 0.949 | 1.034 | 0.952 | 0.952 | 0.935 | 0.966 | 1.027 | 0.948 | 0.973 | 0.948 | 0.973 |
|             | Chr6  | 1.055 | 0.945 | 0.896 | 0.896 | 0.945 | 1.036 | 0.949 | 0.949 | 0.930 | 0.964 | 1.029 | 0.944 | 0.971 | 0.944 | 0.971 |
|             | Chr7  | 1.059 | 0.941 | 0.889 | 0.889 | 0.941 | 1.033 | 0.953 | 0.953 | 0.935 | 0.967 | 1.021 | 0.960 | 0.979 | 0.960 | 0.979 |
|             | Chr8  | 1.049 | 0.951 | 0.906 | 0.906 | 0.951 | 1.033 | 0.954 | 0.954 | 0.937 | 0.967 | 1.015 | 0.970 | 0.985 | 0.970 | 0.985 |
|             | Chr9  | 1.055 | 0.945 | 0.896 | 0.896 | 0.945 | 1.032 | 0.954 | 0.954 | 0.937 | 0.968 | 1.020 | 0.961 | 0.980 | 0.961 | 0.980 |
|             | Chr10 | 1.052 | 0.948 | 0.901 | 0.901 | 0.948 | 1.033 | 0.953 | 0.953 | 0.936 | 0.967 | 1.022 | 0.956 | 0.978 | 0.956 | 0.978 |
|             | Chr11 | 1.047 | 0.953 | 0.911 | 0.911 | 0.953 | 1.028 | 0.960 | 0.960 | 0.945 | 0.972 | 1.019 | 0.963 | 0.981 | 0.963 | 0.981 |
|             | Chr12 | 1.045 | 0.955 | 0.914 | 0.914 | 0.955 | 1.032 | 0.955 | 0.955 | 0.938 | 0.968 | 1.027 | 0.948 | 0.973 | 0.948 | 0.973 |
|             | Chr13 | 1.039 | 0.961 | 0.926 | 0.926 | 0.961 | 1.022 | 0.969 | 0.969 | 0.957 | 0.978 | 1.019 | 0.964 | 0.981 | 0.964 | 0.981 |
|             | Chr14 | 1.057 | 0.943 | 0.893 | 0.893 | 0.943 | 1.033 | 0.953 | 0.953 | 0.936 | 0.967 | 1.025 | 0.951 | 0.975 | 0.951 | 0.975 |
|             | Chr15 | 1.053 | 0.947 | 0.900 | 0.900 | 0.947 | 1.030 | 0.957 | 0.957 | 0.941 | 0.970 | 1.023 | 0.956 | 0.977 | 0.956 | 0.977 |
|             | Chr16 | 1.060 | 0.940 | 0.887 | 0.887 | 0.940 | 1.030 | 0.957 | 0.957 | 0.941 | 0.970 | 1.010 | 0.981 | 0.990 | 0.981 | 0.990 |
|             | Chr17 | 1.061 | 0.939 | 0.885 | 0.885 | 0.939 | 1.040 | 0.943 | 0.943 | 0.922 | 0.960 | 1.029 | 0.944 | 0.971 | 0.944 | 0.971 |
|             | Chr18 | 1.039 | 0.961 | 0.925 | 0.925 | 0.961 | 1.024 | 0.965 | 0.965 | 0.953 | 0.976 | 1.020 | 0.960 | 0.980 | 0.960 | 0.980 |
|             | Chr19 | 1.064 | 0.936 | 0.879 | 0.879 | 0.936 | 1.058 | 0.918 | 0.918 | 0.890 | 0.942 | 1.048 | 0.909 | 0.952 | 0.909 | 0.952 |
|             | Chr20 | 1.053 | 0.947 | 0.899 | 0.899 | 0.947 | 1.039 | 0.945 | 0.945 | 0.926 | 0.961 | 1.020 | 0.961 | 0.980 | 0.961 | 0.980 |
|             | Chr21 | 1.044 | 0.956 | 0.915 | 0.915 | 0.956 | 1.026 | 0.962 | 0.962 | 0.948 | 0.974 | 1.021 | 0.958 | 0.979 | 0.958 | 0.979 |
| Chr22       | 1.065 | 0.935 | 0.877 | 0.877 | 0.935 | 1.041 | 0.942 | 0.942 | 0.921 | 0.959 | 1.027 | 0.948 | 0.973 | 0.948 | 0.973 |       |
| ChrX        | 1.501 | 0.499 | 0.458 | 0.458 | 0.499 | 1.448 | 0.527 | 0.527 | 0.504 | 0.552 | 1.436 | 0.514 | 0.564 | 0.514 | 0.564 |       |
| ChrY        | 1.415 | 0.585 | 0.455 | 0.455 | 0.585 | 1.316 | 0.625 | 0.625 | 0.566 | 0.684 | 1.276 | 0.618 | 0.724 | 0.618 | 0.724 |       |
| EAS vs. SAS | Chr1  | 1.050 | 0.950 | 0.904 | 0.904 | 0.950 | 1.032 | 0.954 | 0.954 | 0.938 | 0.968 | 1.023 | 0.954 | 0.977 | 0.954 | 0.977 |
|             | Chr2  | 1.053 | 0.947 | 0.899 | 0.899 | 0.947 | 1.033 | 0.953 | 0.953 | 0.936 | 0.967 | 1.024 | 0.954 | 0.976 | 0.954 | 0.976 |
|             | Chr3  | 1.047 | 0.953 | 0.910 | 0.910 | 0.953 | 1.032 | 0.955 | 0.955 | 0.938 | 0.968 | 1.023 | 0.956 | 0.977 | 0.956 | 0.977 |
|             | Chr4  | 1.040 | 0.960 | 0.924 | 0.924 | 0.960 | 1.029 | 0.958 | 0.958 | 0.943 | 0.971 | 1.023 | 0.954 | 0.977 | 0.954 | 0.977 |
|             | Chr5  | 1.053 | 0.947 | 0.899 | 0.899 | 0.947 | 1.036 | 0.948 | 0.948 | 0.930 | 0.964 | 1.028 | 0.945 | 0.972 | 0.945 | 0.972 |
|             | Chr6  | 1.051 | 0.949 | 0.904 | 0.904 | 0.949 | 1.035 | 0.950 | 0.950 | 0.932 | 0.965 | 1.029 | 0.944 | 0.971 | 0.944 | 0.971 |
|             | Chr7  | 1.058 | 0.942 | 0.891 | 0.891 | 0.942 | 1.032 | 0.954 | 0.954 | 0.937 | 0.968 | 1.021 | 0.959 | 0.979 | 0.959 | 0.979 |
|             | Chr8  | 1.049 | 0.951 | 0.906 | 0.906 | 0.951 | 1.032 | 0.954 | 0.954 | 0.937 | 0.968 | 1.015 | 0.970 | 0.985 | 0.970 | 0.985 |
|             | Chr9  | 1.055 | 0.945 | 0.896 | 0.896 | 0.945 | 1.032 | 0.955 | 0.955 | 0.938 | 0.968 | 1.020 | 0.962 | 0.980 | 0.962 | 0.980 |
|             | Chr10 | 1.051 | 0.949 | 0.903 | 0.903 | 0.949 | 1.032 | 0.954 | 0.954 | 0.937 | 0.968 | 1.022 | 0.958 | 0.978 | 0.958 | 0.978 |
|             | Chr11 | 1.048 | 0.952 | 0.908 | 0.908 | 0.952 | 1.029 | 0.958 | 0.958 | 0.943 | 0.971 | 1.019 | 0.962 | 0.981 | 0.962 | 0.981 |
|             | Chr12 | 1.043 | 0.957 | 0.918 | 0.918 | 0.957 | 1.031 | 0.956 | 0.956 | 0.940 | 0.969 | 1.026 | 0.949 | 0.974 | 0.949 | 0.974 |

|                                        |             |       |       |       |       |       |       |       |       |       |       |       |       |       |       |       |
|----------------------------------------|-------------|-------|-------|-------|-------|-------|-------|-------|-------|-------|-------|-------|-------|-------|-------|-------|
|                                        | Chr13       | 1.039 | 0.961 | 0.924 | 0.924 | 0.961 | 1.022 | 0.968 | 0.968 | 0.957 | 0.978 | 1.018 | 0.965 | 0.982 | 0.965 | 0.982 |
|                                        | Chr14       | 1.058 | 0.942 | 0.890 | 0.890 | 0.942 | 1.033 | 0.953 | 0.953 | 0.935 | 0.967 | 1.024 | 0.954 | 0.976 | 0.954 | 0.976 |
|                                        | Chr15       | 1.053 | 0.947 | 0.899 | 0.899 | 0.947 | 1.031 | 0.957 | 0.957 | 0.941 | 0.969 | 1.023 | 0.955 | 0.977 | 0.955 | 0.977 |
|                                        | Chr16       | 1.060 | 0.940 | 0.887 | 0.887 | 0.940 | 1.029 | 0.958 | 0.958 | 0.943 | 0.971 | 1.009 | 0.982 | 0.991 | 0.982 | 0.991 |
|                                        | Chr17       | 1.062 | 0.938 | 0.883 | 0.883 | 0.938 | 1.039 | 0.944 | 0.944 | 0.924 | 0.961 | 1.028 | 0.946 | 0.972 | 0.946 | 0.972 |
|                                        | Chr18       | 1.039 | 0.961 | 0.925 | 0.925 | 0.961 | 1.023 | 0.967 | 0.967 | 0.954 | 0.977 | 1.020 | 0.961 | 0.980 | 0.961 | 0.980 |
|                                        | Chr19       | 1.066 | 0.934 | 0.876 | 0.876 | 0.934 | 1.060 | 0.915 | 0.915 | 0.886 | 0.940 | 1.050 | 0.905 | 0.950 | 0.905 | 0.950 |
|                                        | Chr20       | 1.053 | 0.947 | 0.900 | 0.900 | 0.947 | 1.036 | 0.949 | 0.949 | 0.930 | 0.964 | 1.019 | 0.964 | 0.981 | 0.964 | 0.981 |
|                                        | Chr21       | 1.047 | 0.953 | 0.910 | 0.910 | 0.953 | 1.027 | 0.961 | 0.961 | 0.947 | 0.973 | 1.022 | 0.957 | 0.978 | 0.957 | 0.978 |
|                                        | Chr22       | 1.066 | 0.934 | 0.877 | 0.877 | 0.934 | 1.039 | 0.945 | 0.945 | 0.925 | 0.961 | 1.024 | 0.954 | 0.976 | 0.954 | 0.976 |
|                                        | ChrX        | 1.489 | 0.511 | 0.473 | 0.473 | 0.511 | 1.437 | 0.539 | 0.539 | 0.518 | 0.563 | 1.430 | 0.524 | 0.570 | 0.524 | 0.570 |
| ChrY                                   | 1.187       | 0.813 | 0.691 | 0.691 | 0.813 | 1.100 | 0.865 | 0.865 | 0.824 | 0.900 | 1.075 | 0.869 | 0.925 | 0.869 | 0.925 |       |
| Mean across Chromosomes Per Population | AFR vs. AMR | 1.086 | 0.914 | 0.863 | 0.863 | 0.914 | 1.066 | 0.917 | 0.917 | 0.897 | 0.934 | 1.060 | 0.909 | 0.940 | 0.909 | 0.940 |
|                                        | AFR vs. EUR | 1.090 | 0.910 | 0.858 | 0.858 | 0.910 | 1.070 | 0.912 | 0.912 | 0.891 | 0.930 | 1.063 | 0.903 | 0.937 | 0.903 | 0.937 |
|                                        | AFR vs. EAS | 1.079 | 0.921 | 0.869 | 0.869 | 0.921 | 1.058 | 0.925 | 0.925 | 0.904 | 0.942 | 1.051 | 0.917 | 0.949 | 0.917 | 0.949 |
|                                        | AFR vs. SAS | 1.079 | 0.921 | 0.870 | 0.870 | 0.921 | 1.058 | 0.926 | 0.926 | 0.906 | 0.942 | 1.051 | 0.918 | 0.949 | 0.918 | 0.949 |
|                                        | AMR vs. EUR | 1.088 | 0.912 | 0.862 | 0.862 | 0.912 | 1.064 | 0.920 | 0.920 | 0.900 | 0.936 | 1.052 | 0.921 | 0.948 | 0.921 | 0.948 |
|                                        | AMR vs. EAS | 1.085 | 0.915 | 0.865 | 0.865 | 0.915 | 1.063 | 0.921 | 0.921 | 0.902 | 0.937 | 1.053 | 0.920 | 0.947 | 0.920 | 0.947 |
|                                        | AMR vs. SAS | 1.085 | 0.915 | 0.866 | 0.866 | 0.915 | 1.062 | 0.922 | 0.922 | 0.903 | 0.938 | 1.051 | 0.922 | 0.949 | 0.922 | 0.949 |
|                                        | EUR vs. EAS | 1.088 | 0.912 | 0.860 | 0.860 | 0.912 | 1.065 | 0.918 | 0.918 | 0.898 | 0.935 | 1.054 | 0.918 | 0.946 | 0.918 | 0.946 |
|                                        | EUR vs. SAS | 1.086 | 0.914 | 0.865 | 0.865 | 0.914 | 1.063 | 0.921 | 0.921 | 0.902 | 0.937 | 1.051 | 0.922 | 0.949 | 0.922 | 0.949 |
| EAS vs. SAS                            | 1.076       | 0.924 | 0.875 | 0.875 | 0.924 | 1.053 | 0.932 | 0.932 | 0.914 | 0.947 | 1.042 | 0.933 | 0.958 | 0.933 | 0.958 |       |
| Mean across Populations per Chromosome | Chr1        | 1.053 | 0.947 | 0.900 | 0.900 | 0.947 | 1.035 | 0.950 | 0.950 | 0.933 | 0.965 | 1.026 | 0.949 | 0.974 | 0.949 | 0.974 |
|                                        | Chr2        | 1.055 | 0.945 | 0.896 | 0.896 | 0.945 | 1.035 | 0.950 | 0.950 | 0.932 | 0.965 | 1.027 | 0.947 | 0.973 | 0.947 | 0.973 |
|                                        | Chr3        | 1.048 | 0.952 | 0.908 | 0.908 | 0.952 | 1.034 | 0.952 | 0.952 | 0.934 | 0.966 | 1.026 | 0.949 | 0.974 | 0.949 | 0.974 |
|                                        | Chr4        | 1.042 | 0.958 | 0.920 | 0.920 | 0.958 | 1.031 | 0.955 | 0.955 | 0.939 | 0.969 | 1.027 | 0.948 | 0.973 | 0.948 | 0.973 |
|                                        | Chr5        | 1.053 | 0.947 | 0.899 | 0.899 | 0.947 | 1.037 | 0.948 | 0.948 | 0.929 | 0.963 | 1.031 | 0.940 | 0.969 | 0.940 | 0.969 |
|                                        | Chr6        | 1.053 | 0.947 | 0.899 | 0.899 | 0.947 | 1.037 | 0.948 | 0.948 | 0.929 | 0.963 | 1.031 | 0.940 | 0.969 | 0.940 | 0.969 |
|                                        | Chr7        | 1.059 | 0.941 | 0.888 | 0.888 | 0.941 | 1.035 | 0.950 | 0.950 | 0.932 | 0.965 | 1.025 | 0.952 | 0.975 | 0.952 | 0.975 |
|                                        | Chr8        | 1.051 | 0.949 | 0.903 | 0.903 | 0.949 | 1.035 | 0.950 | 0.950 | 0.932 | 0.965 | 1.018 | 0.964 | 0.982 | 0.964 | 0.982 |
|                                        | Chr9        | 1.056 | 0.944 | 0.893 | 0.893 | 0.944 | 1.034 | 0.952 | 0.952 | 0.934 | 0.966 | 1.023 | 0.956 | 0.977 | 0.956 | 0.977 |
|                                        | Chr10       | 1.052 | 0.948 | 0.900 | 0.900 | 0.948 | 1.035 | 0.951 | 0.951 | 0.933 | 0.965 | 1.025 | 0.951 | 0.975 | 0.951 | 0.975 |
|                                        | Chr11       | 1.050 | 0.950 | 0.906 | 0.906 | 0.950 | 1.031 | 0.956 | 0.956 | 0.940 | 0.969 | 1.022 | 0.956 | 0.978 | 0.956 | 0.978 |
|                                        | Chr12       | 1.046 | 0.954 | 0.912 | 0.912 | 0.954 | 1.034 | 0.952 | 0.952 | 0.935 | 0.966 | 1.030 | 0.942 | 0.970 | 0.942 | 0.970 |
|                                        | Chr13       | 1.041 | 0.959 | 0.922 | 0.922 | 0.959 | 1.024 | 0.966 | 0.966 | 0.954 | 0.976 | 1.020 | 0.960 | 0.980 | 0.960 | 0.980 |
|                                        | Chr14       | 1.060 | 0.940 | 0.887 | 0.887 | 0.940 | 1.035 | 0.950 | 0.950 | 0.932 | 0.965 | 1.027 | 0.947 | 0.973 | 0.947 | 0.973 |
|                                        | Chr15       | 1.054 | 0.946 | 0.897 | 0.897 | 0.946 | 1.032 | 0.954 | 0.954 | 0.937 | 0.968 | 1.026 | 0.949 | 0.974 | 0.949 | 0.974 |
|                                        | Chr16       | 1.062 | 0.938 | 0.883 | 0.883 | 0.938 | 1.033 | 0.953 | 0.953 | 0.936 | 0.967 | 1.012 | 0.976 | 0.988 | 0.976 | 0.988 |
|                                        | Chr17       | 1.063 | 0.937 | 0.882 | 0.882 | 0.937 | 1.043 | 0.939 | 0.939 | 0.918 | 0.957 | 1.032 | 0.937 | 0.968 | 0.937 | 0.968 |
|                                        | Chr18       | 1.041 | 0.959 | 0.922 | 0.922 | 0.959 | 1.026 | 0.963 | 0.963 | 0.950 | 0.974 | 1.024 | 0.954 | 0.976 | 0.954 | 0.976 |
|                                        | Chr19       | 1.065 | 0.935 | 0.878 | 0.878 | 0.935 | 1.061 | 0.914 | 0.914 | 0.885 | 0.939 | 1.051 | 0.903 | 0.949 | 0.903 | 0.949 |
|                                        | Chr20       | 1.054 | 0.946 | 0.898 | 0.898 | 0.946 | 1.040 | 0.943 | 0.943 | 0.923 | 0.960 | 1.023 | 0.954 | 0.977 | 0.954 | 0.977 |

|  |       |       |       |       |       |       |       |       |       |       |       |       |       |       |       |       |
|--|-------|-------|-------|-------|-------|-------|-------|-------|-------|-------|-------|-------|-------|-------|-------|-------|
|  | Chr21 | 1.047 | 0.953 | 0.910 | 0.910 | 0.953 | 1.029 | 0.959 | 0.959 | 0.944 | 0.971 | 1.026 | 0.949 | 0.974 | 0.949 | 0.974 |
|  | Chr22 | 1.065 | 0.935 | 0.877 | 0.877 | 0.935 | 1.041 | 0.942 | 0.942 | 0.921 | 0.959 | 1.029 | 0.944 | 0.971 | 0.944 | 0.971 |
|  | ChrX  | 1.497 | 0.503 | 0.463 | 0.463 | 0.503 | 1.448 | 0.527 | 0.527 | 0.503 | 0.552 | 1.440 | 0.508 | 0.560 | 0.508 | 0.560 |
|  | ChrY  | 1.351 | 0.649 | 0.523 | 0.523 | 0.649 | 1.263 | 0.686 | 0.686 | 0.634 | 0.737 | 1.247 | 0.663 | 0.753 | 0.663 | 0.753 |



## Online Supplementary Figures (Figs S1-S4)

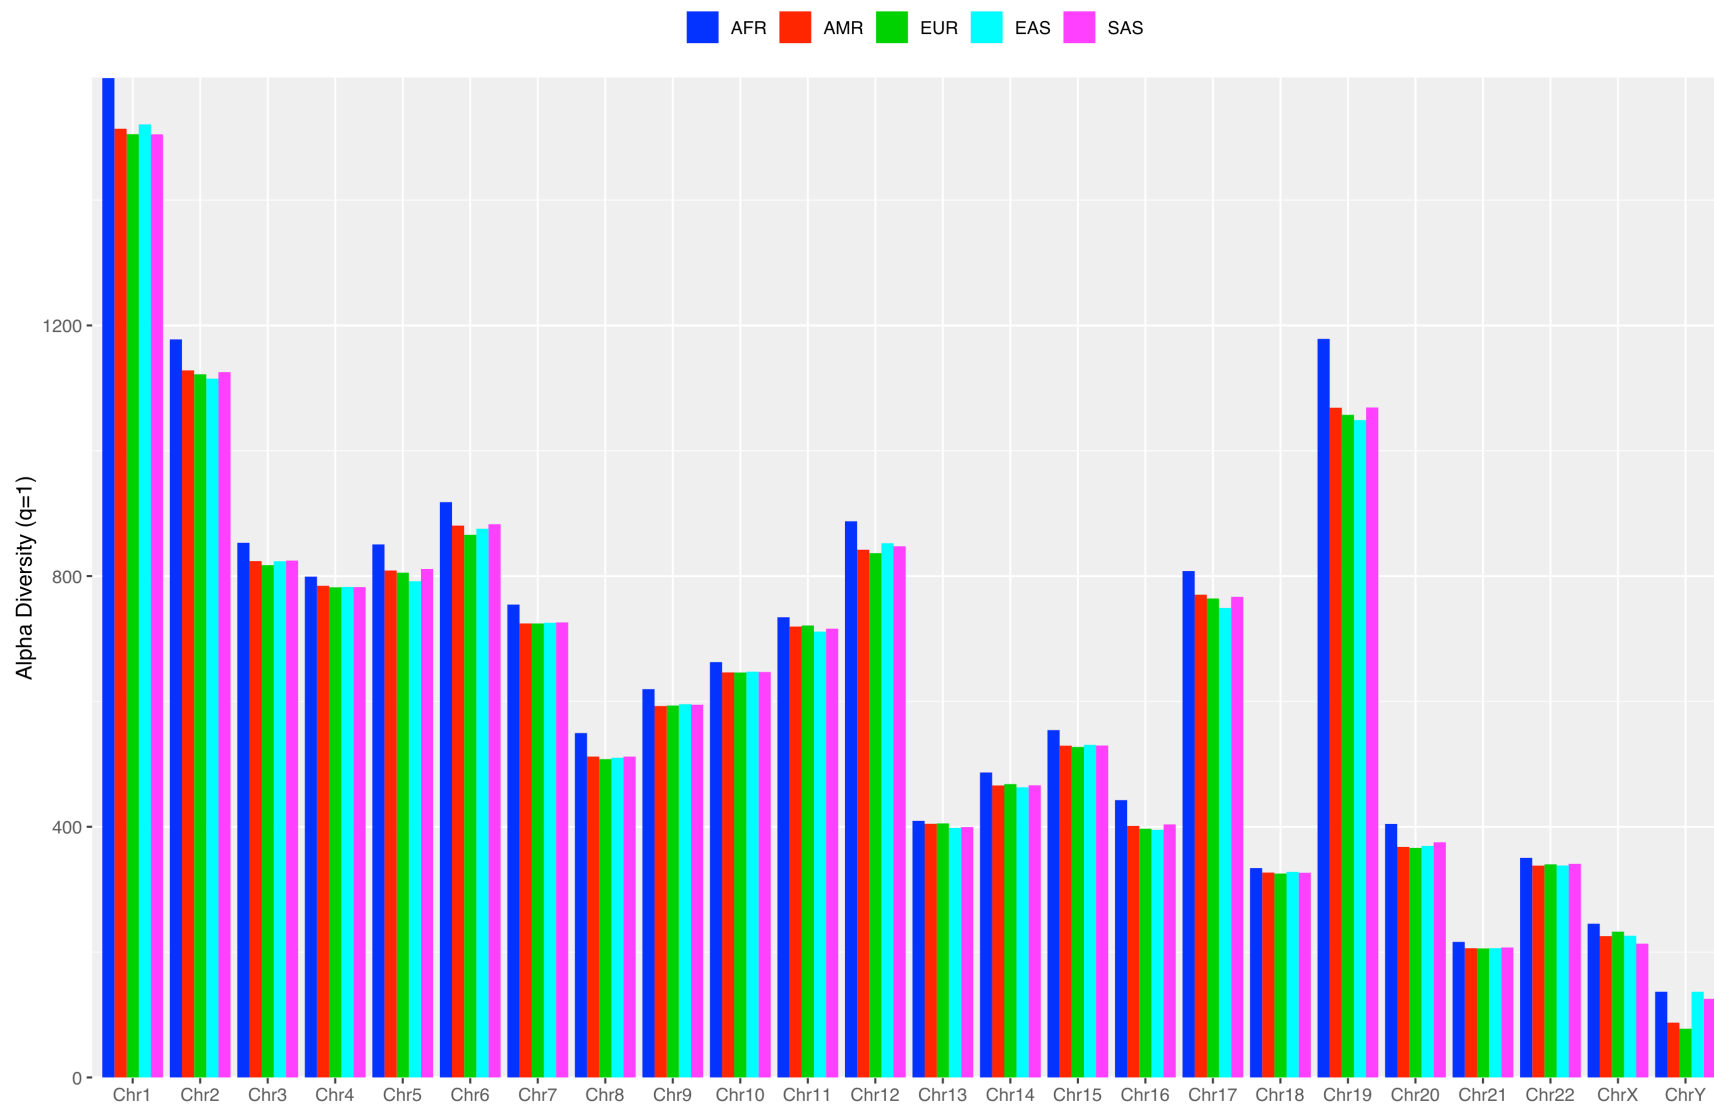

**Fig S1.** The mean (per individual) SNP alpha-diversity ( $q=1$ ) at the chromosome level for the 1000-Genomes Project

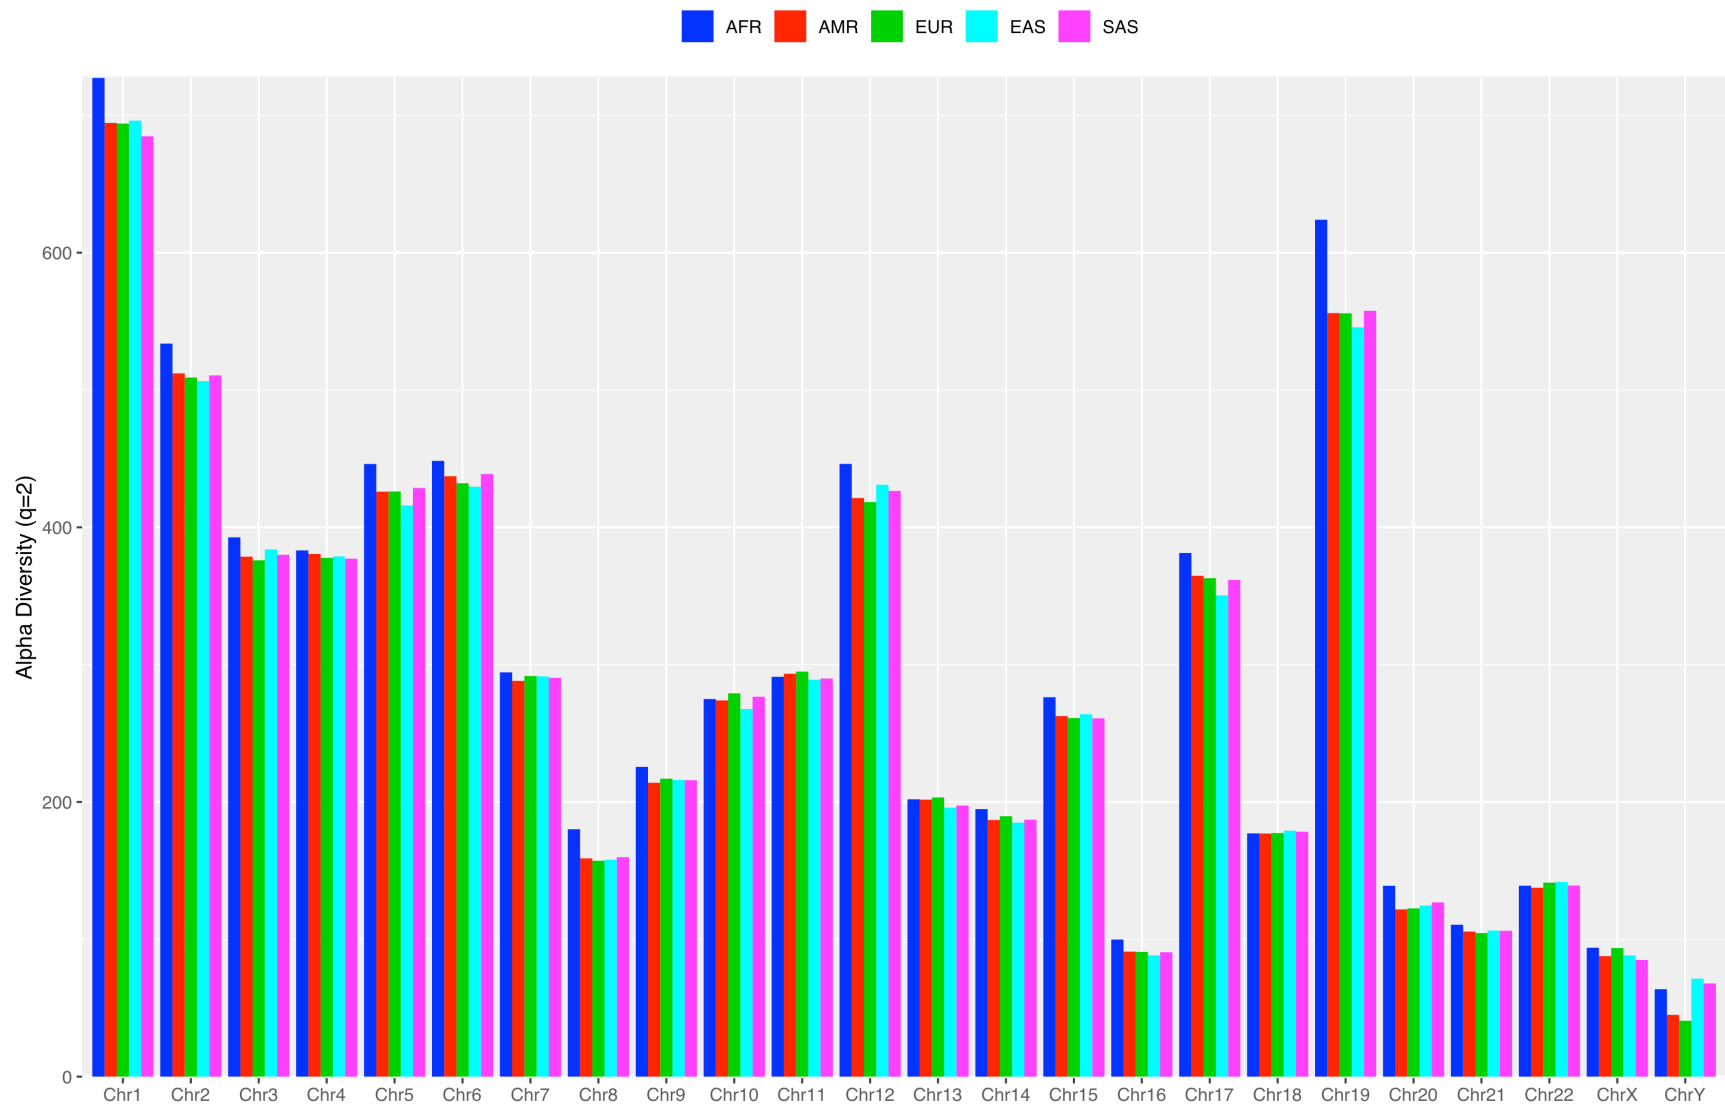

**Fig S2.** The mean (per individual) SNP alpha-diversity ( $q=2$ ) at the chromosome level for the 1000-Genomes Project

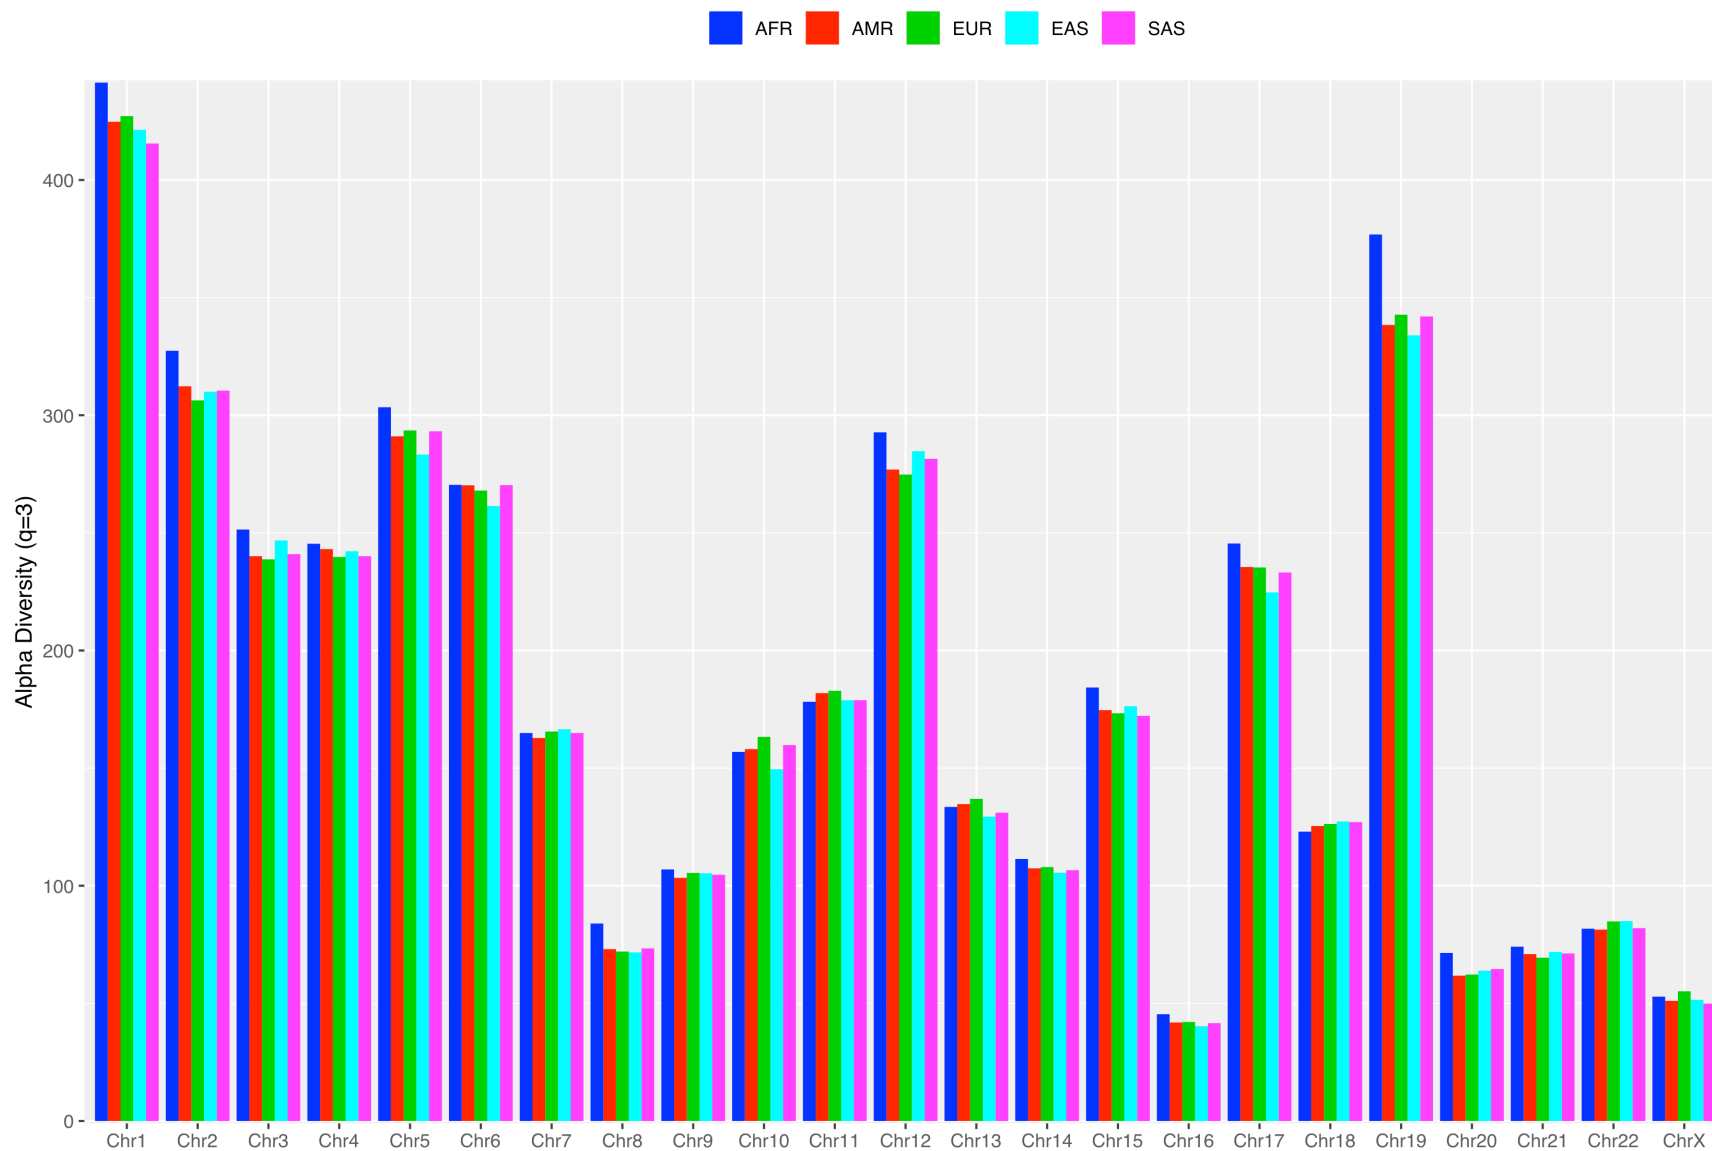

**Fig S3.** The mean (per individual) SNP alpha-diversity ( $q=3$ ) at the chromosome level for the 1000-Genomes Project

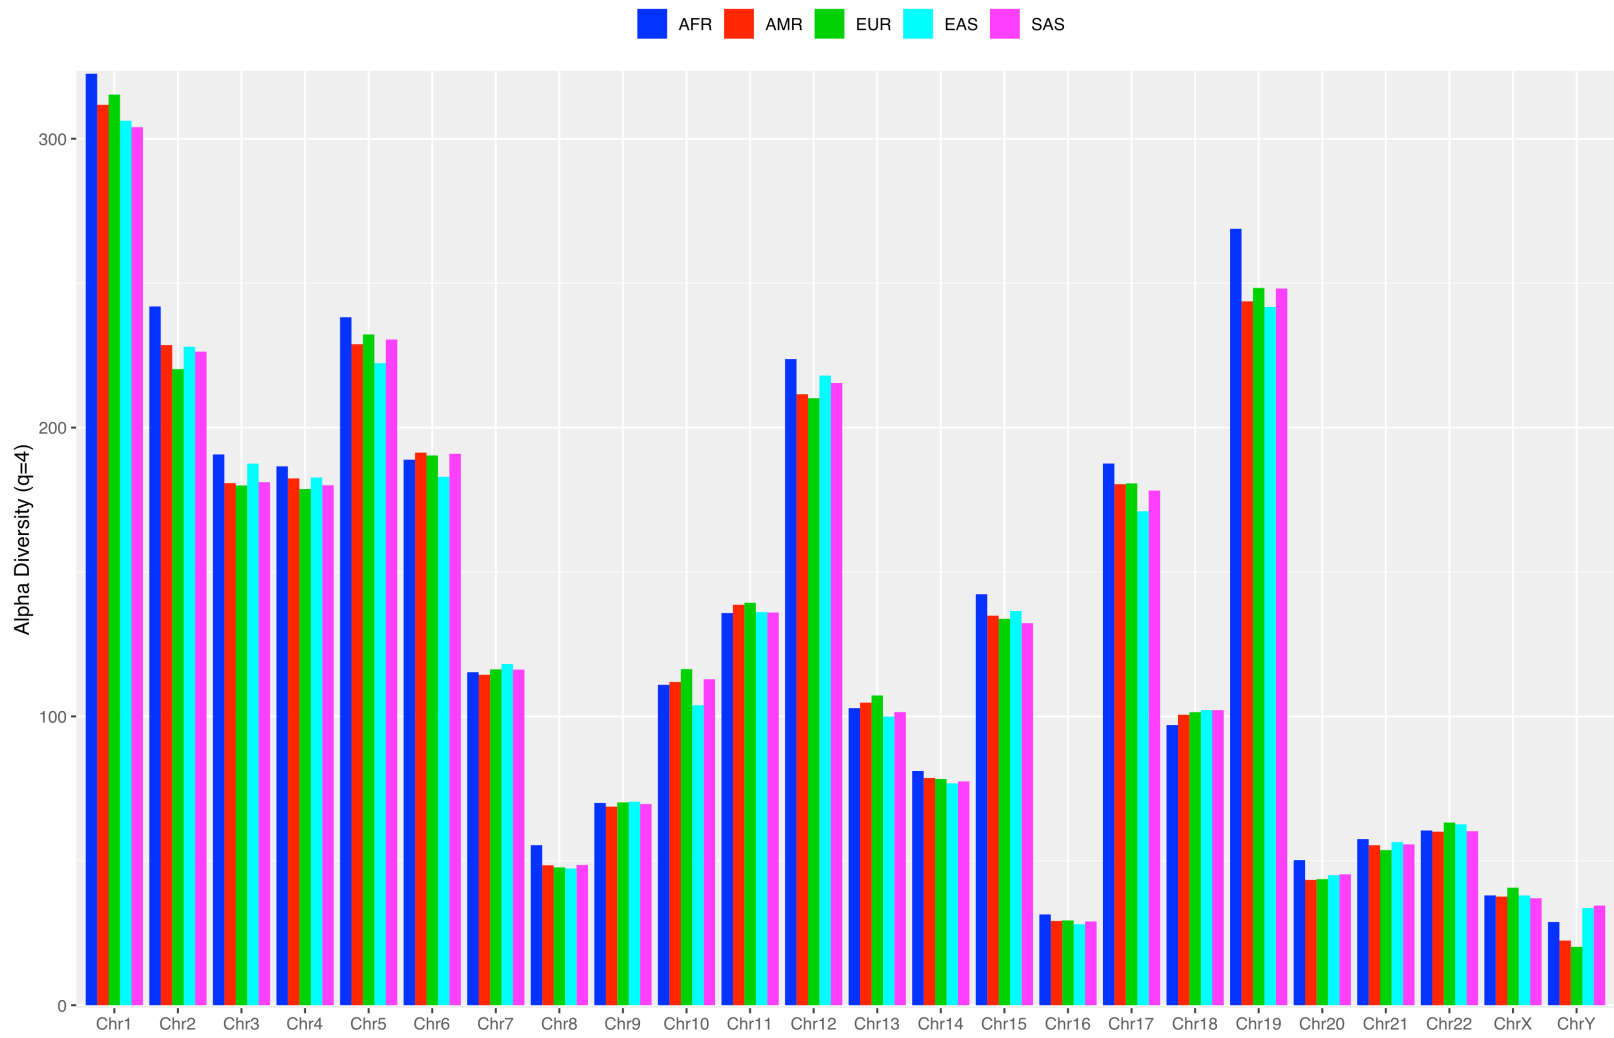

**Fig S4.** The mean (per individual) SNP alpha-diversity ( $q=4$ ) at the chromosome level for the 1000-Genomes Project

The **R codes** for computing alpha-diversity, beta-diversity (including similarity) profiles

# The Help file for R-Codes: alpha-diversity.r & beta-diversity-similarity.r

## alpha-diversity.r

### (1) Input file

The input file is an  $M \times N$  matrix, with elements representing the number of SNPs on each locus from a chromosome or a genome, separated by “\t” (Tab) symbol, where  $M$  is the number of chromosomes or individuals, and  $N$  is the number of loci. The first row lists the gene names, and the first column lists sample IDs or names.

### (2) Usage

```
$ Rscript alpha-diversity.r filename
```

```
#filename is the input file containing SNP matrix
```

### (3) Output file

The output file contains the alpha-diversity of each chromosome (or individual). The first column is IDs or names of chromosomes (individuals). The second to the last column are the alpha-diversity values from diversity order ( $q=0$  to  $q=4$ ).

## beta-diversity-similarity.r

### (1) Input files

Two input files are required to run the code. Each input file is an  $M \times N$  matrix, with elements representing the number of SNPs on each locus from a chromosome or a genome, separated by “\t” (Tab) symbol, where  $M$  is the number of chromosomes or individuals, and  $N$  is the number of loci. The first row lists the gene names, and the first column lists sample IDs or names.

### (2) Usage

```
$ Rscript beta-diversity-similarity.r file1 file2
```

```
# file1 and file2 are two files, each of which contains a SNP matrix.
```

### (3) Output file

The output file contains beta-diversity and four similarity indices for each pair-wise chromosome (individual) comparison. The first and second columns are IDs or names of pair-wise individuals. The third column is the diversity order ( $q$ ). The fourth column is beta-diversity; the remaining columns are the four similarity indices.

```
#SNP alpha-diversity
```

```
#usage: Rscript alpha-diversity.r filename #filename is the file containing the SNP matrix.
```

```
d.chao<-function(A,lev,q)
{
  tot<-sum(A)
  eA<-A/tot
  eA<-eA[eA>0]
  if(is.vector(A)){
    cA<-A
    N<-1
  }else{
    cA<-colSums(A)
    N<-nrow(A)
  }
  ecA<-cA/tot
  ecA<-ecA[ecA>0]
  if(lev=='alpha'){
    if(q!=1){
      Da<-(1/N)*(sum(eA^q))^(1/(1-q))
      D.value<-Da
    }else{
      Da<-exp(-sum(eA*log(eA))-log(N))
      D.value<-Da
    }
  }
  if(lev=='beta'){
    D.value<-d.chao(A,lev='gamma',q)/d.chao(A,lev='alpha',q)
  }
  if(lev=='gamma'){
    if(q!=1){
      Dg<-(sum(ecA^q))^(1/(1-q))
      D.value<-Dg
    }else{
      Dg<-exp(-sum(ecA*log(ecA)))
      D.value<-Dg
    }
  }
  D.value
}
```

```
# Calculating
```

```
args=commandArgs(T)
```

```
da=read.table(paste(args[1],sep=""),header=T,sep="\t",stringsAsFactors=F)
```

```
ID=as.vector(da[,1])
```

```
dat=da[,2:ncol(da)]
```

```
dat=as.matrix(dat)
```

```
Alpha=matrix(0,nrow(dat),5)
```

```
for(n in 1:nrow(dat)){
```

```
otu=dat[n,]  
otu=otu[otu>0]  
otu=otu[!is.na(otu)]  
for(q in 0:4){  
  Alpha[n,q+1]<-d.chao(otu,"alpha",q)  
}  
}  
Alpha=cbind(ID,Alpha)  
colnames(Alpha)=c("ID","q=0","q=1","q=2","q=3","q=4")  
write.table(Alpha,"Alpha-diversity.txt",row.names=F,col.names=T,quote=F,sep="\t")
```



```
# Beta diversity and similarity
# usage: Rscript beta_diversity_similarity.r file1 file2 #file1 and file2 are two files which contain SNP
matrix.
```

```
#Function for computing diversity
```

```
d.chao<-function(A,lev,q)
{
  tot<-sum(A)
  eA<-A/tot
  eA<-eA[eA>0]
  if(is.vector(A)){
    cA<-A
    N<-1
  }else{
    cA<-colSums(A)
    N<-nrow(A)
  }
  ecA<-cA/tot
  ecA<-ecA[ecA>0]
  if(lev=='alpha'){
    if(q!=1){
      Da<-(1/N)*(sum(eA^q))^(1/(1-q))
      D.value<-Da
    }else{
      Da<-exp(-sum(eA*log(eA))-log(N))
      D.value<-Da
    }
  }
  if(lev=='beta'){
    D.value<-d.chao(A,lev='gamma',q)/d.chao(A,lev='alpha',q)
  }
  if(lev=='gamma'){
    if(q!=1){
      Dg<-(sum(ecA^q))^(1/(1-q))
      D.value<-Dg
    }else{
      Dg<-exp(-sum(ecA*log(ecA)))
      D.value<-Dg
    }
  }
  D.value
}
```

```
#Functiton for computing similarity: Cq, Uq, Sq, Vq
```

```
Cq<-function(A,beta,q,N){
  if(q!=1){
    cq<-(((1/beta)^(q-1))-((1/N)^(q-1)))/(1-(1/N)^(q-1))
  }
  else{
```

```

tot<-sum(A)
eA<-A/tot
cs<-colSums(eA)
lcs<-log(cs)
x<-cs*lcs
x<-x[x!="NaN"]
hb=- (sum(x))

pa=A/rowSums(A)
x<-pa*log(pa)
y<-rowSums(x, na.rm=T)
z<-rowSums(A)/tot
yz=y*z
x<-yz[yz!="NaN"]
ha=- (sum(x))

wa=rowSums(A)/tot
hc=sum(wa*log(wa))

cq=(ha-hb-hc)/log(N)
}
cq
}

Uq<-function(A,beta,q,N){
  if(q!=1){
    uq<-(((1/beta)^(1-q))-((1/N)^(1-q)))/(1-(1/N)^(1-q))
  }
  else{
    tot<-sum(A)
    eA<-A/tot
    cs<-colSums(eA)
    lcs<-log(cs)
    x<-cs*lcs
    x<-x[x!="NaN"]
    hb=- (sum(x))

    pa=A/rowSums(A)
    x<-pa*log(pa)
    y<-rowSums(x, na.rm=T)
    z<-rowSums(A)/tot
    yz=y*z
    x<-yz[yz!="NaN"]
    ha=- (sum(x))

    wa=rowSums(A)/tot
    hc=sum(wa*log(wa))

    uq=(ha-hb-hc)/log(N)
  }
}

```

```

    }
    uq
}

Sq<-function(A,beta,q,N){
  sq<-((1/beta)-(1/N))/(1-1/N)
  sq
}

Vq<-function(A,beta,q,N){
  vq<-1-((beta-1)/(N-1))
  vq
}

# Main process
args=commandArgs(T)
dam=read.table(paste(args[1],sep=""),header=T,sep="\t",stringsAsFactors=F)
dan=read.table(paste(args[2],sep=""),header=T,sep="\t",stringsAsFactors=F)
IDm=dam[,1]
IDn=dan[,1]
Res=numeric()
for(x in 1:nrow(dam)){
  for(y in 1:nrow(dan)){
    sda<-rbind(dam[x,2:ncol(dam)],dan[y,2:ncol(dan)])
    for(q in 0:4){
      beta<-d.chao(sda,"beta",q)
      cq<-Cq(sda,beta,q,2)
      uq<-Uq(sda,beta,q,2)
      sq<-Sq(sda,beta,q,2)
      vq<-Vq(sda,beta,q,2)
      res<-cbind(IDm[x],IDn[y],q,beta,cq,uq,sq,vq)
      Res=rbind(Res,res)
    }
  }
}
colnames(Res)=c("ID1","ID2","order","beta.D","cq","uq","sq","vq")
write.table(Res,"Beta-diversity-and-similarity.txt",row.names=F,col.names=T,sep="\t",quote=F)

```
